# Supplementary material for: Host-Directed Antimicrobial Drugs with Broad-Spectrum Efficacy against Intracellular Bacterial Pathogens
Source: PubMed Central journal article supplement — mBio. 2014 Jul 29;5(4):e01534-14. doi: 10.1128/mBio.01534-14 (PMC4128363; doi:10.1128/mbio.01534-14), 2014-07-29
Supplement: mbo004141922sf03.pdf [file mbo004141922sf03.pdf]

A

Compounds Inhibiting Intracellular *C. burnetii* Growth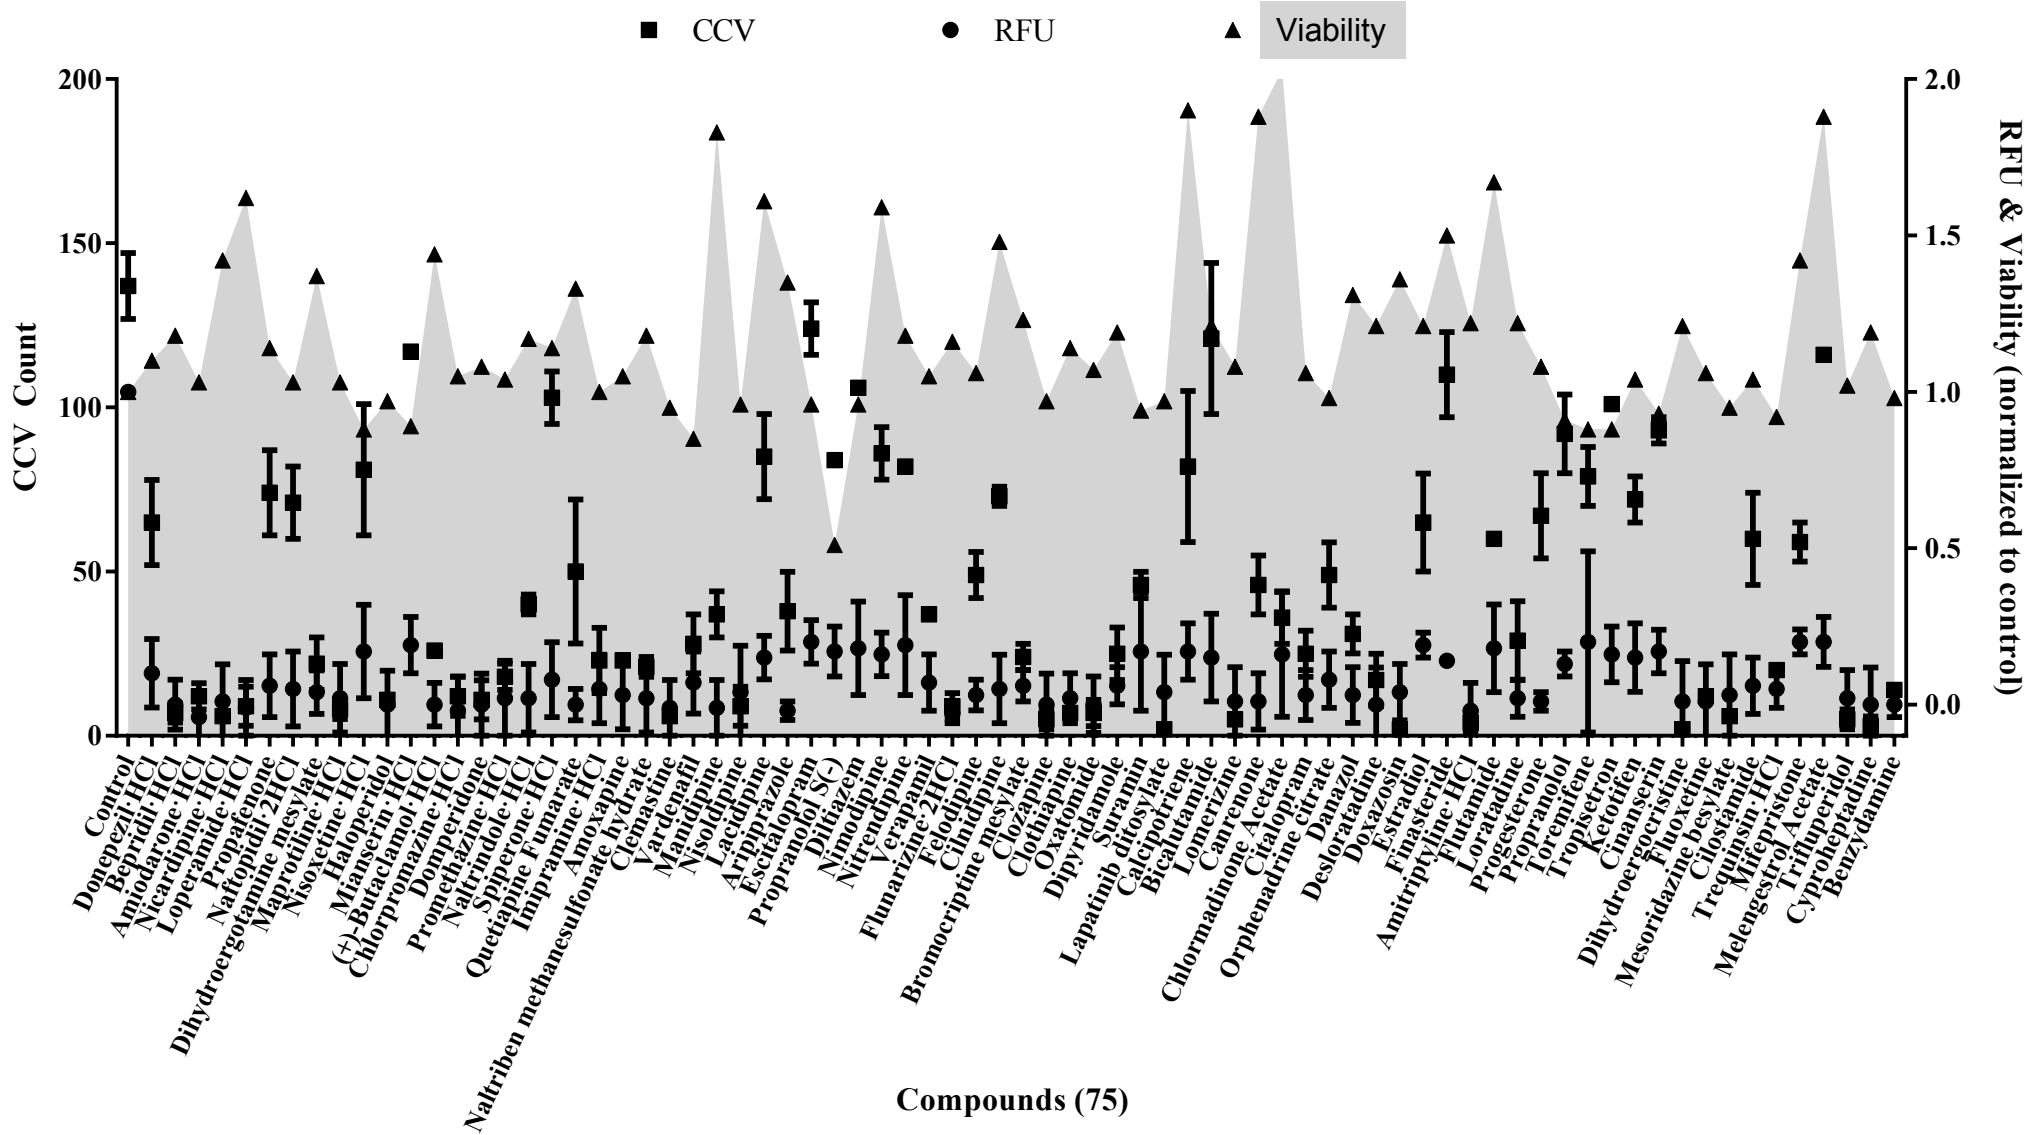

**B**

### Size Distribution of CCVs

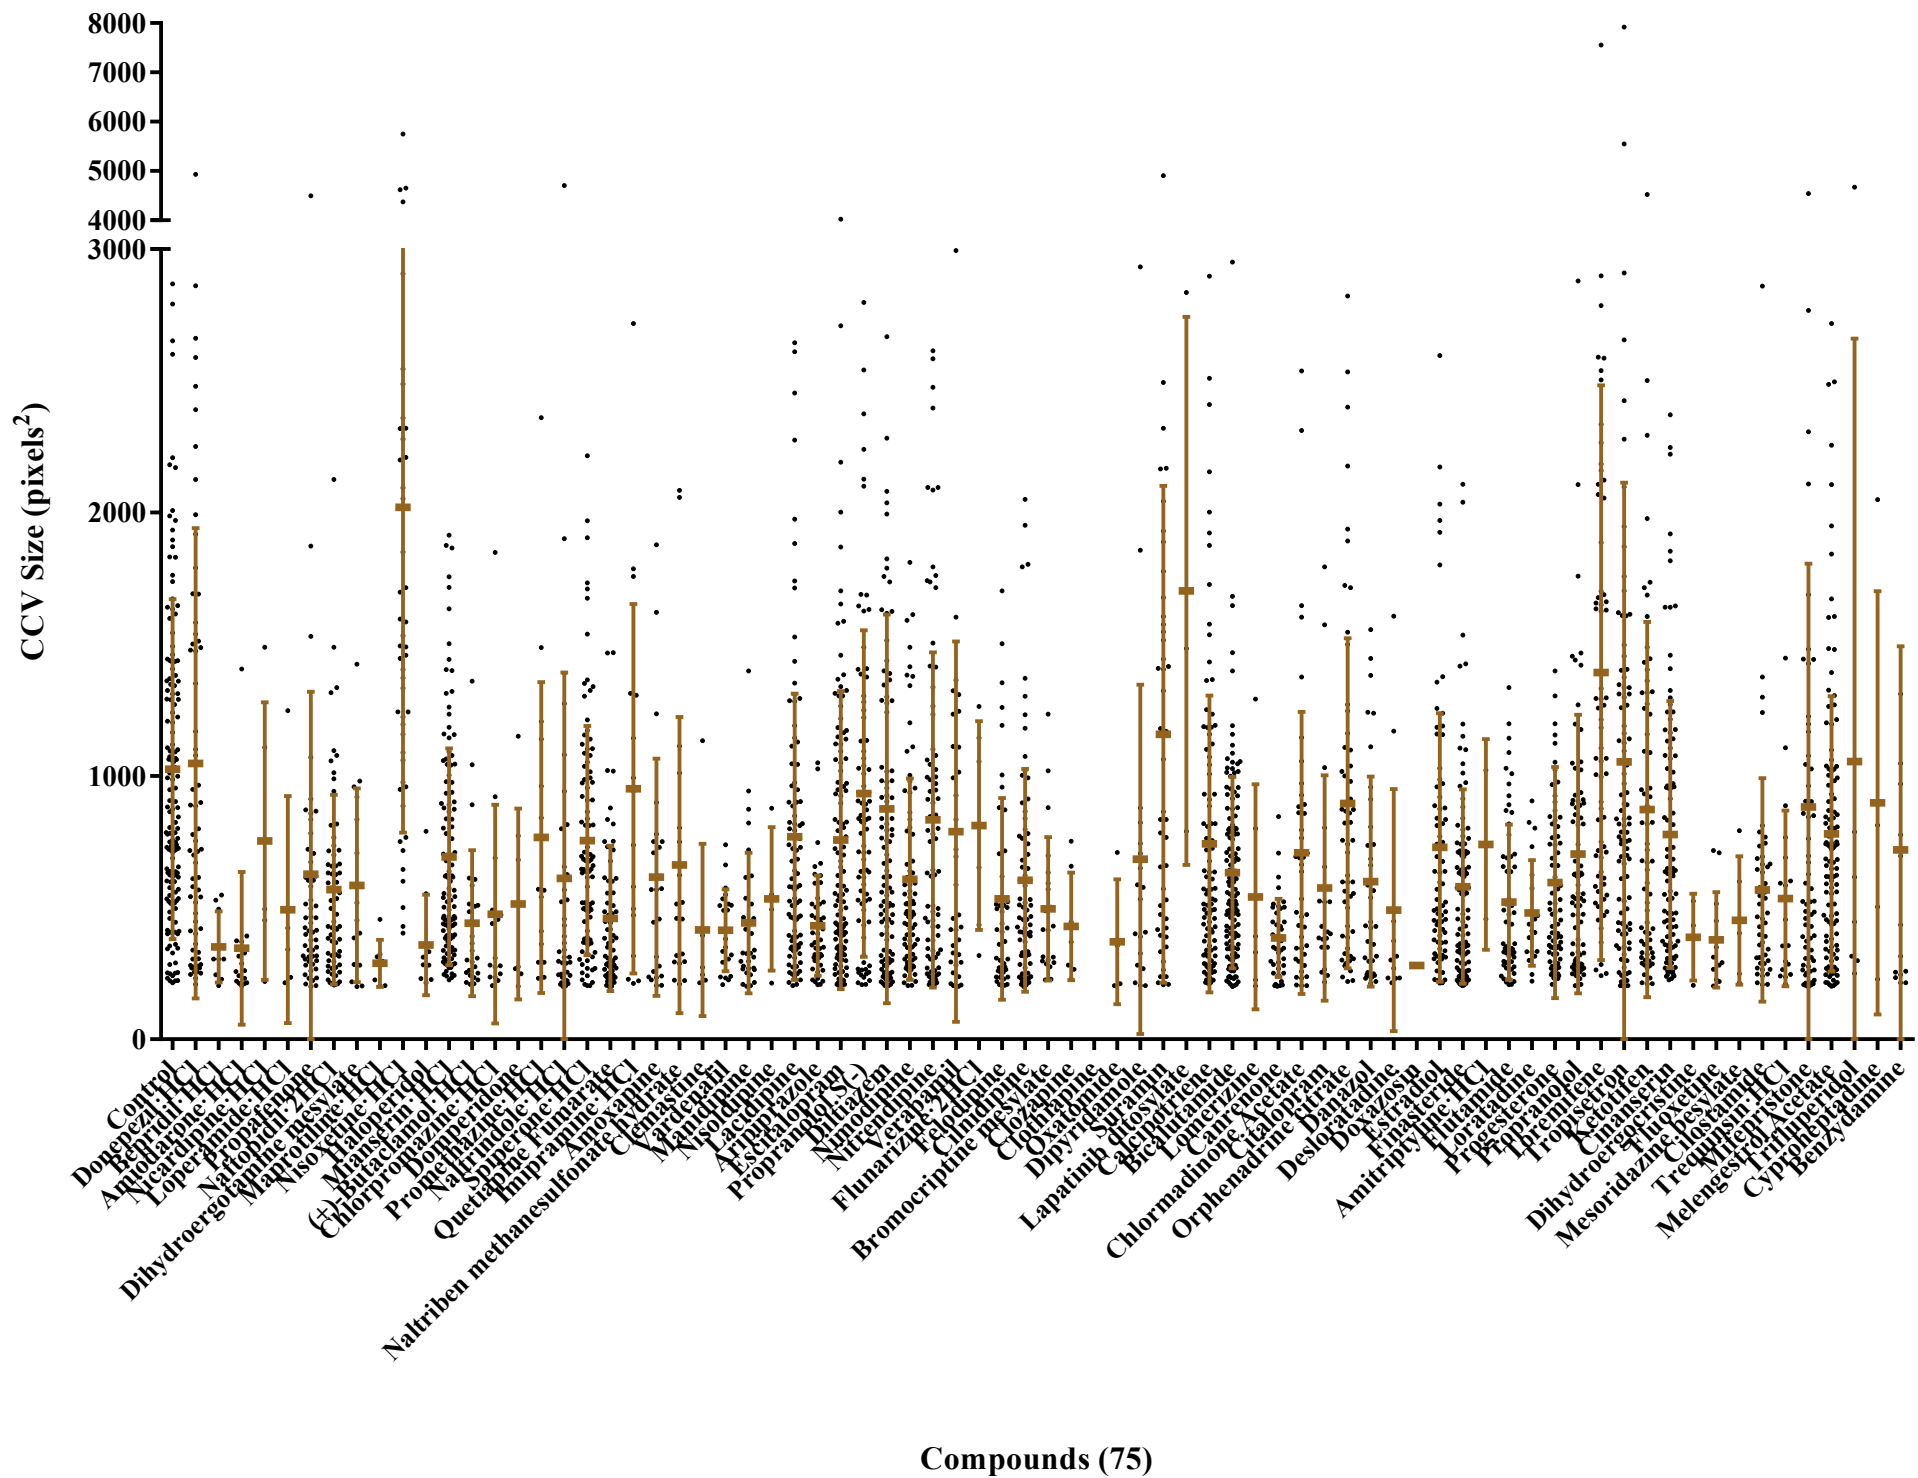

Compounds (75)
