# Supplementary material for: Host-Directed Antimicrobial Drugs with Broad-Spectrum Efficacy against Intracellular Bacterial Pathogens
Source: PubMed Central journal article supplement — mBio. 2014 Jul 29;5(4):e01534-14. doi: 10.1128/mBio.01534-14 (PMC4128363; doi:10.1128/mbio.01534-14), 2014-07-29
Supplement: mbo004141922sf05.pdf [file mbo004141922sf05.pdf]

A

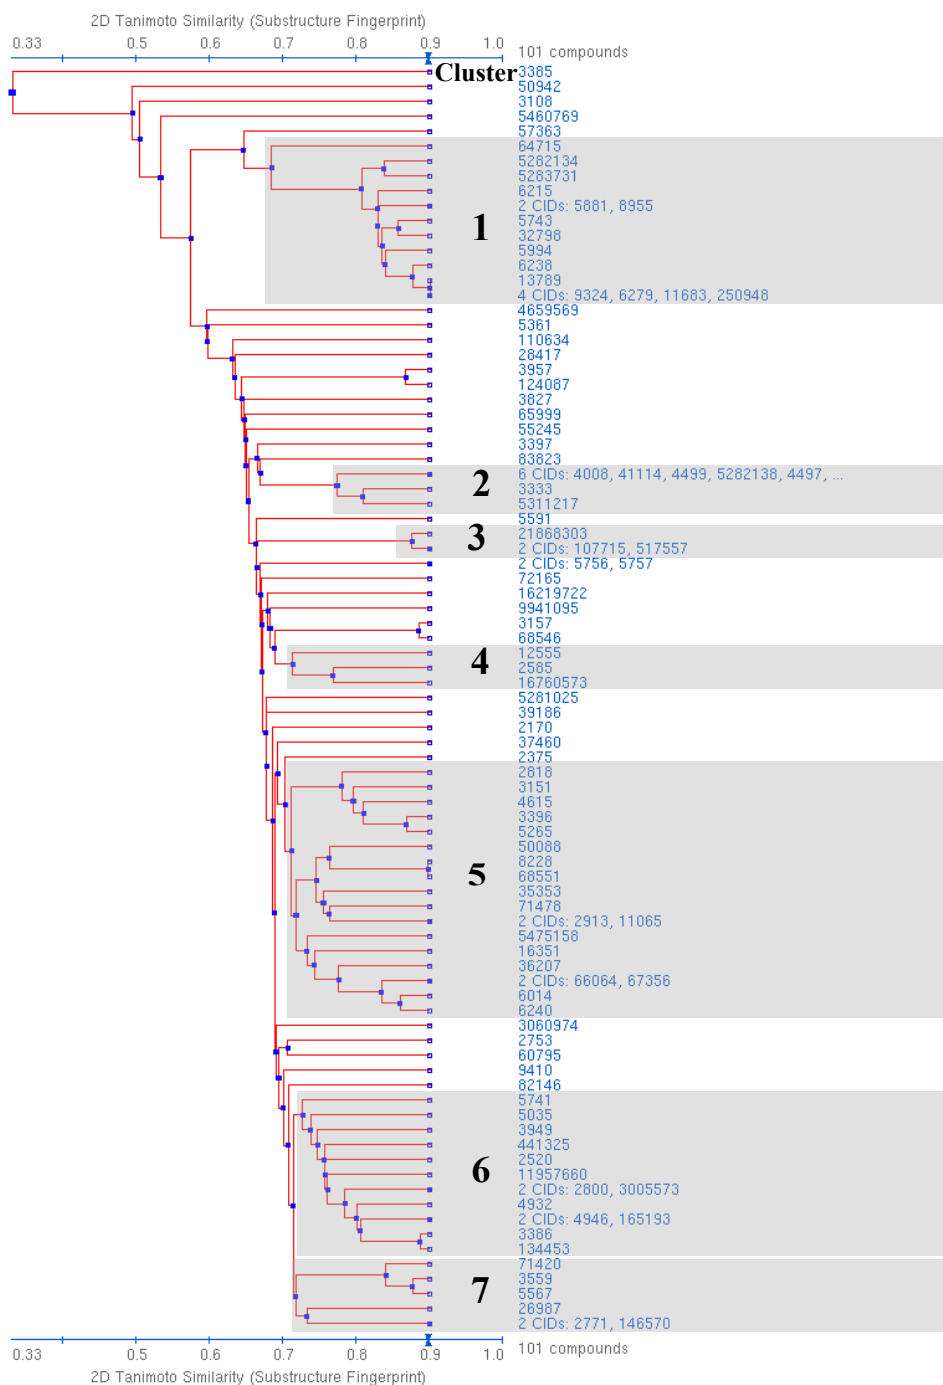

B

| Compound Name | Pathogen                   | CID        |          |
|---------------|----------------------------|------------|----------|
| 254           | Mevastatin                 | Rc         | 64715    |
| 283           | Calcipotriene              | Cb         | 5282134  |
| 220           | Calcifediol                | Rc         | 5283731  |
| 446           | Fluocinolone acetonide     | Ba         | 6215     |
| 411           | Dehydroepiandrosterone     | Ba         | 5881     |
| 527           | Pregnenolone               | Lp         | 8955     |
| 226           | Dexamethasone              | Ba         | 5743     |
| 401           | Clobetasol Propionate      | Ba         | 32798    |
| 523           | Progesterone               | Cb         | 5994     |
| 463           | 17-Hydroxyprogesterone     | Ba         | 6238     |
| 380           | Canrenone                  | Cb         | 13789    |
| 388           | Chlormadinone Acetate      | Cb         | 9324     |
| 482           | Medroxyprogesterone 17-Ac. | Lp         | 6279     |
| 621           | Megestrol Acetate          | Lp         | 11683    |
| 622           | Melengestrol Acetate       | Cb, Lp     | 250948   |
| 135           | Manidipine                 | Cb         | 4008     |
| 14            | Nicardipine-HCl            | Cb         | 41114    |
| 139           | Nisoldipine                | Cb, Lp, Rc | 4499     |
| 203           | Clindipine                 | Cb         | 5282138  |
| 196           | Nimodipine                 | Cb         | 4497     |
| 197           | Nitrendipine               | Cb         | 4507     |
| 202           | Felodipine                 | Cb, Rc     | 3333     |
| 140           | Lacidipine                 | Cb         | 5311217  |
| 215           | Bromocriptine mesylate     | Cb, Lp     | 21868303 |
| 594           | Dihydroergocristine        | Cb, Lp     | 107715   |
| 40            | Dihydroergotamine mesylate | Cb         | 517557   |
| 640           | Benzydamine                | Cb         | 12555    |
| 164           | Carvedilol                 | Lp         | 2585     |
| 105           | Naltrindole-HCl            | Cb, Rc     | 16760573 |
| 216           | Clozapine                  | Cb         | 2818     |
| 96            | Domperidone                | Cb, Rc     | 3151     |
| 223           | Oxatomide                  | Cb, Lp     | 4615     |
| 17            | Fluspirilene               | Lp, Rc     | 3396     |
| 107           | Spiperone-HCl              | Cb, Lp     | 5265     |
| 12            | Bepiridil-HCl              | Cb, Lp, Rc | 50088    |
| 113           | Imipramine-HCl             | Cb         | 8228     |
| 81            | Mianserin-HCl              | Cb         | 68551    |
| 200           | Flunarizine-2HCl           | Cb         | 35353    |
| 55            | Maprotiline-HCl            | Cb         | 71478    |
| 639           | Cyproheptadine             | Cb, Lp     | 2913     |
| 444           | Amitriptyline-HCl          | Cb, Lp     | 11065    |
| 592           | Cinanserin                 | Cb         | 5475158  |
| 217           | Clothiapine                | Cb         | 16351    |
| 600           | Mesoridazine besylate      | Cb         | 36207    |
| 205           | Trifluoperazine-2HCl       | Lp, Ba, Rc | 66064    |
| 97            | Fluphenazine-2HCl          | Rc         | 67356    |
| 103           | Promethazine-HCl           | Cb         | 6014     |
| 95            | Chlorpromazine-HCl         | Cb, Lp     | 6240     |
| 5             | Donepezil-HCl              | Cb         | 5741     |
| 262           | Raloxifene                 | Lp         | 5035     |
| 330           | Lomerizine                 | Cb, Lp, Ba | 3949     |
| 13            | Amiodarone-HCl             | Cb         | 441325   |
| 198           | Verapamil                  | Cb, Rc     | 2520     |
| 33            | Naftopidil-2HCl            | Cb         | 11957660 |
| 398           | Clomiphene                 | Ba, Rc     | 2800     |
| 570           | Toremifene                 | Cb         | 3005573  |
| 24            | Propafenone                | Cb         | 4932     |
| 540           | Propranolol                | Cb         | 4946     |
| 163           | Propranolol S(-)           | Cb         | 165193   |
| 596           | Fluoxetine                 | Cb, Rc     | 3386     |
| 56            | Nisoxetine-HCl             | Cb         | 134453   |
| 16            | Loperamide HCl             | Cb, Lp, Rc | 71420    |
| 67            | Haloperidol                | Cb         | 3559     |
| 637           | Trifluoperidol             | Cb, Lp, Rc | 5567     |
| 130           | Clemastine                 | Cb, Lp, Rc | 26987    |
| 394           | Citalopram                 | Cb         | 2771     |
| 153           | Escitalopram               | Cb         | 146570   |
