# Supplementary material for: Host-Directed Antimicrobial Drugs with Broad-Spectrum Efficacy against Intracellular Bacterial Pathogens
Source: PubMed Central journal article supplement — mBio. 2014 Jul 29;5(4):e01534-14. doi: 10.1128/mBio.01534-14 (PMC4128363; doi:10.1128/mbio.01534-14), 2014-07-29
Supplement: mbo004141922st1.pdf [file mbo004141922st1.pdf]

## Cytotoxic by Imaging

## Cytotoxic by MTT

Method:

MTT

Imaging

Time (hours):

4 24 48 72 120

120

| Comp. No. | Name                           | MTT  |      |      |      |      | Imaging |      |
|-----------|--------------------------------|------|------|------|------|------|---------|------|
|           |                                | 4    | 24   | 48   | 72   | 120  | StDev   |      |
| 1         | Moroxydine-HCl                 | 0.75 | 1.05 | 1.05 | 1.07 | 0.86 | 1.21    | 0.10 |
| 2         | Clindamycin-HCl                | 0.88 | 0.99 | 0.95 | 1.12 | 0.92 | 0.99    | 0.08 |
| 3         | Felbamate                      | 0.83 | 1.08 | 0.87 | 1.17 | 0.94 | 1.04    | 0.11 |
| 4         | Cyclosporin A                  | 0.98 | 0.19 | 0.17 | 0.02 | 0.19 | 0.46    | 0.11 |
| 5         | Donepezil-HCl                  | 0.77 | 1.03 | 0.93 | 0.41 | 1.10 | 0.82    | 0.08 |
| 6         | Lincomycin                     | 0.96 | 1.05 | 0.99 | 1.27 | 0.88 | 0.97    | 0.07 |
| 7         | Lomofungin                     | 0.78 | 0.60 | 0.26 | 0.06 | 0.21 | 0.55    | 0.17 |
| 8         | Mycophenolic Acid              | 0.84 | 0.89 | 0.88 | 1.24 | 0.81 | 0.90    | 0.09 |
| 9         | Novobiocin-Na                  | 0.96 | 1.09 | 1.14 | 1.63 | 1.20 | 1.13    | 0.09 |
| 10        | Rapamycin                      | 1.03 | 1.07 | 1.01 | 1.34 | 0.24 | 1.15    | 0.08 |
| 11        | Spectinomycin-2HCl             | 0.95 | 1.01 | 1.02 | 1.27 | 0.89 | 1.15    | 0.16 |
| 12        | Bepridil-HCl                   | 0.96 | 0.71 | 0.80 | 1.27 | 1.18 | 1.24    | 0.13 |
| 13        | Amiodarone-HCl                 | 0.88 | 0.87 | 0.78 | 0.01 | 1.03 | 1.03    | 0.29 |
| 14        | Nicardipine-HCl                | 0.95 | 1.05 | 0.92 | 1.69 | 1.42 | 1.24    | 0.09 |
| 15        | Pimozide                       | 0.69 | 0.65 | 0.58 | 0.02 | 1.40 | 0.31    | 0.18 |
| 16        | Loperamide-HCl                 | 0.60 | 0.82 | 0.77 | 0.79 | 1.62 | 0.89    | 0.13 |
| 17        | Fluspirilene                   | 0.82 | 0.76 | 0.72 | 1.39 | 1.14 | 0.20    | 0.03 |
| 18        | Tolbutamide                    | 0.95 | 1.10 | 1.06 | 1.61 | 1.13 | 1.11    | 0.10 |
| 19        | Pinacidil                      | 0.80 | 1.22 | 0.98 | 1.90 | 1.16 | 1.11    | 0.10 |
| 20        | Glipizide                      | 0.73 | 1.05 | 1.08 | 1.42 | 1.09 | 1.05    | 0.10 |
| 21        | Phentolamine                   | 0.83 | 0.97 | 0.83 | 0.91 | 0.93 | 1.06    | 0.07 |
| 22        | Quinine-HCl·2H <sub>2</sub> O  | 1.08 | 1.05 | 1.06 | 1.12 | 1.06 | 0.99    | 0.10 |
| 23        | Flufenamic acid                | 0.72 | 1.32 | 0.88 | 1.24 | 1.02 | 1.30    | 0.15 |
| 24        | Propafenone                    | 0.77 | 0.95 | 0.83 | 1.14 | 1.14 | 1.19    | 0.12 |
| 25        | Phenytoin                      | 0.72 | 1.12 | 0.94 | 1.23 | 1.04 | 1.14    | 0.16 |
| 26        | Procainamide-HCl               | 0.71 | 1.08 | 0.96 | 1.21 | 0.99 | 1.00    | 0.14 |
| 27        | Lidocaine-HCl·H <sub>2</sub> O | 0.99 | 1.09 | 0.94 | 1.17 | 0.93 | 1.11    | 0.14 |
| 28        | Flecainide acetate             | 0.86 | 1.05 | 0.95 | 1.22 | 1.08 | 1.13    | 0.10 |
| 29        | Rosiglitazone maleate          | 0.77 | 0.95 | 0.90 | 1.35 | 1.45 | 1.32    | 0.18 |
| 30        | Amantadine-HCl                 | 0.93 | 0.95 | 0.90 | 1.22 | 1.00 | 0.99    | 0.11 |
| 31        | Oxymetazoline-HCl              | 0.97 | 1.04 | 1.09 | 1.09 | 0.95 | 1.37    | 0.17 |
| 32        | Ifenprodil tartrate            | 0.85 | 1.05 | 0.95 | 1.34 | 1.10 | 1.21    | 0.09 |
| 33        | Naftopidil-2HCl                | 0.87 | 1.03 | 0.85 | 1.12 | 1.03 | 1.35    | 0.15 |
| 34        | Prazosin-HCl                   | 0.71 | 0.96 | 0.82 | 1.39 | 1.23 | 0.95    | 0.24 |
| 35        | Clonidine-HCl                  | 0.78 | 1.02 | 0.85 | 0.90 | 0.98 | 1.18    | 0.11 |
| 36        | Guanabenz                      | 0.76 | 1.05 | 0.93 | 1.27 | 1.13 | 1.20    | 0.21 |
| 37        | Rilmenidine phosphate          | 0.75 | 1.07 | 1.00 | 1.13 | 1.03 | 1.08    | 0.10 |
| 38        | Buphenine-HCl                  | 0.75 | 0.97 | 0.78 | 0.93 | 1.10 | 1.05    | 0.11 |
| 39        | Yohimbine-HCl                  | 0.90 | 1.00 | 0.87 | 1.37 | 1.09 | 0.93    | 0.11 |
| 40        | Dihydroergotamine mesylate     | 1.20 | 1.12 | 1.06 | 0.99 | 1.37 | 0.88    | 0.14 |
| 41        | Nicergoline                    | 0.84 | 0.92 | 0.69 | 1.04 | 0.88 | 1.39    | 0.19 |

| Comp. No. | Name                   | MTT  |      |      |      |      | Imaging |      |
|-----------|------------------------|------|------|------|------|------|---------|------|
|           |                        | 4    | 24   | 48   | 72   | 120  | 120     |      |
| Method:   | Time (hours):          |      |      |      |      |      | StDev   |      |
| 42        | Emtricitabine          | 1.06 | 0.98 | 0.72 | 1.15 | 0.87 | 1.13    | 0.23 |
| 43        | Betaxolol·HCl          | 0.89 | 1.07 | 0.72 | 1.22 | 0.87 | 1.31    | 0.19 |
| 44        | Caffeine               | 0.90 | 0.88 | 0.71 | 1.19 | 0.90 | 1.10    | 0.12 |
| 45        | (S)-Timolol maleate    | 0.99 | 0.94 | 0.76 | 1.06 | 1.11 | 1.13    | 0.15 |
| 46        | Xamoterol hemifumarate | 0.89 | 0.93 | 0.65 | 0.90 | 1.02 | 0.97    | 0.25 |
| 47        | Clenbuterol            | 0.83 | 0.96 | 0.77 | 0.73 | 0.97 | 0.97    | 0.17 |
| 48        | Procaterol·HCl         | 0.96 | 0.95 | 0.67 | 0.91 | 0.91 | 1.02    | 0.11 |
| 49        | Salbutamol hemisulfate | 1.01 | 1.01 | 0.56 | 0.87 | 0.95 | 0.96    | 0.06 |
| 50        | Pindolol               | 0.96 | 1.05 | 0.71 | 1.08 | 0.96 | 1.03    | 0.12 |
| 51        | Cimaterol              | 1.16 | 1.04 | 0.61 | 0.75 | 0.86 | 1.02    | 0.10 |
| 52        | Dobutamine·HCl         | 0.99 | 1.16 | 0.62 | 1.07 | 0.90 | 1.30    | 0.22 |
| 53        | Pronethalol·HCl        | 1.27 | 0.95 | 0.64 | 0.98 | 0.87 | 1.03    | 0.10 |
| 54        | Sotalol·HCl            | 0.98 | 1.10 | 0.71 | 1.31 | 0.98 | 1.18    | 0.16 |
| 55        | Maprotiline·HCl        | 1.28 | 0.93 | 0.64 | 1.16 | 1.03 | 0.93    | 0.12 |
| 56        | Nisoxetine·HCl         | 1.55 | 1.02 | 0.70 | 1.00 | 0.88 | 1.12    | 0.21 |
| 57        | Canthaxanthin          | 1.56 | 1.19 | 0.71 | 0.98 | 0.93 | 1.07    | 0.10 |
| 58        | Pilocarpine·HCl        | 1.80 | 0.77 | 0.72 | 1.07 | 0.98 | 1.03    | 0.11 |
| 59        | Ipratropium·Br         | 0.97 | 0.84 | 0.70 | 1.13 | 1.01 | 1.15    | 0.16 |
| 60        | Pirenzepine·2HCl       | 0.98 | 0.93 | 0.77 | 1.07 | 1.09 | 0.99    | 0.08 |
| 61        | Telenzepine·2HCl       | 1.30 | 1.23 | 0.93 | 1.05 | 0.93 | 1.20    | 0.09 |
| 62        | Tropicamide            | 0.90 | 0.92 | 1.02 | 1.20 | 0.97 | 1.13    | 0.18 |
| 63        | Pancuronium·2Br        | 0.96 | 1.01 | 0.75 | 1.20 | 0.98 | 1.22    | 0.11 |
| 64        | Ivermectin             | 0.53 | 0.13 | 0.13 | 0.01 | 0.16 | 0.44    | 0.27 |
| 65        | Physostigmine sulfate  | 1.20 | 0.88 | 0.92 | 1.14 | 0.91 | 0.99    | 0.19 |
| 66        | Nialamide              | 0.88 | 0.94 | 0.82 | 1.03 | 1.00 | 1.11    | 0.17 |
| 67        | Haloperidol            | 1.13 | 0.97 | 0.76 | 1.00 | 0.97 | 1.00    | 0.10 |
| 68        | Piribedil·2HCl         | 0.91 | 0.87 | 0.87 | 1.79 | 1.32 | 1.35    | 0.13 |
| 69        | Mepyramine maleate     | 0.87 | 1.00 | 0.68 | 1.04 | 1.20 | 1.03    | 0.15 |
| 70        | Trans-triprolidine·HCl | 0.91 | 0.84 | 0.83 | 0.99 | 1.04 | 1.01    | 0.09 |
| 71        | Cimetidine             | 1.41 | 0.96 | 1.01 | 1.08 | 0.92 | 1.11    | 0.14 |
| 72        | Tiotidine              | 1.30 | 1.06 | 0.78 | 0.86 | 0.94 | 1.07    | 0.10 |
| 73        | Zonisamide             | 1.06 | 1.05 | 0.80 | 0.95 | 0.95 | 1.11    | 0.12 |
| 74        | Zoledronic acid        | 1.01 | 0.92 | 0.39 | 0.93 | 0.17 | 0.95    | 0.07 |
| 75        | Naltrexone·HCl         | 0.90 | 1.07 | 0.77 | 0.96 | 0.92 | 0.93    | 0.09 |
| 76        | Zolmitriptan           | 0.99 | 0.90 | 0.83 | 1.07 | 0.94 | 1.10    | 0.13 |
| 77        | Memantine·HCl          | 0.84 | 0.77 | 0.88 | 0.76 | 0.84 | 0.86    | 0.17 |
| 78        | Aniracetam             | 0.88 | 0.79 | 0.87 | 1.11 | 0.93 | 1.02    | 0.11 |
| 79        | Riluzole·HCl           | 0.89 | 1.17 | 0.70 | 1.05 | 0.85 | 1.11    | 0.13 |
| 80        | Propofol               | 0.82 | 0.98 | 0.80 | 0.95 | 1.09 | 1.04    | 0.35 |
| 81        | Mianserin·HCl          | 0.93 | 0.80 | 1.07 | 0.79 | 0.89 | 1.01    | 0.06 |
| 82        | Aminophylline          | 1.06 | 1.10 | 1.00 | 1.13 | 0.99 | 1.05    | 0.05 |
| 83        | Furafylline            | 0.91 | 1.11 | 1.12 | 1.32 | 0.93 | 1.09    | 0.06 |
| 84        | Nateglinide            | 1.07 | 1.11 | 1.17 | 1.24 | 0.95 | 1.07    | 0.05 |

| Comp. No. | Name                               | MTT  |      |      |      |      | Imaging |      |
|-----------|------------------------------------|------|------|------|------|------|---------|------|
|           |                                    | 4    | 24   | 48   | 72   | 120  | 120     |      |
| Method:   | Time (hours):                      |      |      |      |      |      | StDev   |      |
| 85        | DL-Isoproterenol                   | 1.08 | 0.94 | 1.07 | 0.64 | 0.88 | 0.93    | 0.06 |
| 86        | Acetylcholine                      | 0.90 | 0.99 | 1.09 | 0.69 | 0.84 | 0.98    | 0.12 |
| 87        | Atropine                           | 0.99 | 0.86 | 1.02 | 1.37 | 0.91 | 1.13    | 0.14 |
| 88        | Decamethonium                      | 1.18 | 1.03 | 1.13 | 1.17 | 0.93 | 1.05    | 0.06 |
| 89        | Mecamylamine                       | 0.83 | 1.16 | 0.90 | 0.73 | 0.92 | 0.84    | 0.11 |
| 90        | Neostigmine                        | 1.21 | 1.17 | 1.14 | 0.71 | 1.02 | 0.82    | 0.07 |
| 91        | Strychnine-HCl                     | 0.93 | 1.10 | 1.21 | 1.27 | 1.01 | 1.11    | 0.05 |
| 92        | (+)-Tubocurarine chloride          | 0.88 | 0.87 | 2.48 | 1.23 | 1.05 | 0.98    | 0.13 |
| 93        | (+)-Butaclamol-HCl                 | 0.85 | 0.96 | 0.96 | 0.08 | 1.44 | 0.91    | 0.12 |
| 94        | (R)-(-)-Apomorphine-HCl            | 0.79 | 1.03 | 0.84 | 0.55 | 1.01 | 0.84    | 0.26 |
| 95        | Chlorpromazine-HCl                 | 0.75 | 0.56 | 0.71 | 1.19 | 1.05 | 1.05    | 0.07 |
| 96        | Domperidone                        | 1.00 | 0.85 | 0.84 | 0.99 | 1.08 | 1.20    | 0.06 |
| 97        | Fluphenazine-2HCl                  | 0.55 | 0.80 | 0.84 | 1.49 | 1.17 | 0.00    | 0.00 |
| 98        | Pergolide mesylate                 | 0.83 | 0.72 | 0.67 | 0.70 | 0.70 | 0.92    | 0.12 |
| 99        | S(-)-Raclopride                    | 0.81 | 0.78 | 0.91 | 1.29 | 1.13 | 1.07    | 0.09 |
| 100       | Risperidone                        | 0.71 | 0.96 | 0.98 | 1.49 | 1.48 | 1.17    | 0.11 |
| 101       | (S)-(-)-Sulpiride                  | 1.02 | 1.03 | 1.24 | 1.03 | 1.05 | 1.16    | 0.06 |
| 102       | Diphenhydramine-HCl                | 1.05 | 0.83 | 1.34 | 0.92 | 1.08 | 1.12    | 0.06 |
| 103       | Promethazine-HCl                   | 0.96 | 1.11 | 1.30 | 1.25 | 1.04 | 0.83    | 0.12 |
| 104       | Ranitidine-HCl                     | 0.84 | 1.03 | 1.29 | 1.15 | 0.94 | 1.14    | 0.05 |
| 105       | Naltrindole-HCl                    | 0.90 | 0.84 | 1.19 | 1.43 | 1.17 | 1.14    | 0.05 |
| 106       | Idazoxan-HCl                       | 0.94 | 0.95 | 0.93 | 1.06 | 0.97 | 1.17    | 0.05 |
| 107       | Spiperone-HCl                      | 0.78 | 0.79 | 0.84 | 1.60 | 1.14 | 1.19    | 0.05 |
| 108       | L-(+)-Epinephrine tartrate         | 0.68 | 1.17 | 0.77 | 0.72 | 0.97 | 1.02    | 0.05 |
| 109       | Xylazine                           | 0.72 | 1.08 | 1.01 | 0.98 | 0.97 | 1.09    | 0.05 |
| 110       | Norepinephrine-(+)-tartrate L (-)  | 0.98 | 0.79 | 0.84 | 0.72 | 0.99 | 1.10    | 0.07 |
| 111       | Quetiapine Fumarate                | 1.06 | 0.76 | 0.94 | 1.31 | 1.33 | 1.22    | 0.08 |
| 112       | Alprenolol-HCl                     | 0.95 | 1.14 | 0.95 | 0.90 | 0.95 | 1.09    | 0.06 |
| 113       | Imipramine-HCl                     | 0.94 | 0.94 | 1.20 | 1.24 | 1.00 | 1.09    | 0.06 |
| 114       | Amoxapine                          | 0.90 | 0.86 | 0.86 | 1.14 | 1.05 | 0.94    | 0.04 |
| 115       | Mesulergine                        | 0.92 | 0.87 | 0.98 | 1.04 | 1.01 | 1.02    | 0.05 |
| 116       | Amfebutamone                       | 0.85 | 0.91 | 1.12 | 0.90 | 0.87 | 1.10    | 0.11 |
| 117       | Metoclopramide                     | 0.76 | 1.18 | 0.95 | 1.24 | 1.00 | 1.17    | 0.10 |
| 118       | Naltriben methanesulfonate hydrate | 0.98 | 0.93 | 1.09 | 1.65 | 1.18 | 1.29    | 0.06 |
| 119       | Vitamin A acetate                  | 0.74 | 0.96 | 1.09 | 1.29 | 1.10 | 1.21    | 0.07 |
| 120       | Levallorphan                       | 0.64 | 1.20 | 1.00 | 1.00 | 0.97 | 1.12    | 0.07 |
| 121       | Nalbuphine                         | 1.03 | 0.84 | 1.02 | 0.86 | 0.76 | 1.17    | 0.08 |
| 122       | Carbamylcholine                    | 0.84 | 0.87 | 0.89 | 0.98 | 0.89 | 1.12    | 0.05 |
| 123       | Carbamyl-beta-methylcholine        | 0.98 | 0.90 | 0.92 | 1.12 | 0.87 | 1.06    | 0.12 |
| 124       | Butyrylcholine                     | 0.97 | 0.93 | 0.89 | 1.05 | 0.88 | 1.09    | 0.06 |
| 125       | Famotidine                         | 0.86 | 0.95 | 0.87 | 1.04 | 0.88 | 1.12    | 0.09 |
| 126       | Terfenadine                        | 0.86 | 1.79 | 0.96 | 0.01 | 0.16 | 0.10    | 0.01 |
| 127       | Isoniazid                          | 0.96 | 0.86 | 0.86 | 1.16 | 0.96 | 1.16    | 0.10 |

| Comp. No. | Name                 | MTT  |      |      |      |      | Imaging |      |
|-----------|----------------------|------|------|------|------|------|---------|------|
|           |                      | 4    | 24   | 48   | 72   | 120  | 120     |      |
|           |                      |      |      |      |      |      | StDev   |      |
| 128       | Ticlopidine          | 0.94 | 1.07 | 0.92 | 1.27 | 0.91 | 1.06    | 0.05 |
| 129       | Amorolfine           | 0.91 | 0.91 | 0.93 | 1.46 | 0.97 | 1.07    | 0.06 |
| 130       | Clemastine           | 0.95 | 0.74 | 0.71 | 1.15 | 0.95 | 1.01    | 0.05 |
| 131       | Vardenafil           | 1.12 | 1.18 | 1.16 | 1.27 | 0.85 | 1.13    | 0.05 |
| 132       | Linezolid            | 1.28 | 0.90 | 1.15 | 1.08 | 1.03 | 1.22    | 0.06 |
| 133       | Docetaxil            | 1.04 | 0.71 | 0.53 | 0.93 | 0.99 | 0.94    | 0.22 |
| 134       | Olopatadine          | 0.96 | 0.91 | 0.93 | 1.15 | 0.93 | 1.15    | 0.05 |
| 135       | Manidipine           | 0.97 | 1.20 | 1.20 | 1.63 | 1.83 | 1.14    | 0.09 |
| 136       | Tolcapone            | 0.97 | 0.99 | 1.07 | 1.08 | 0.95 | 1.11    | 0.06 |
| 137       | Gestrinone           | 1.10 | 0.97 | 0.95 | 1.40 | 1.19 | 1.20    | 0.07 |
| 138       | Olmesartan           | 1.03 | 0.87 | 0.98 | 1.32 | 0.92 | 1.07    | 0.05 |
| 139       | Nisoldipine          | 0.99 | 1.07 | 0.95 | 1.01 | 0.96 | 0.36    | 0.13 |
| 140       | Lacidipine           | 0.97 | 1.14 | 1.09 | 0.58 | 1.61 | 1.05    | 0.13 |
| 141       | Olanzapine           | 1.12 | 0.88 | 0.89 | 1.10 | 0.87 | 1.15    | 0.06 |
| 142       | Lovastatin           | 1.31 | 0.96 | 0.80 | 0.91 | 0.41 | 0.30    | 0.03 |
| 143       | Lamotrigine          | 1.24 | 1.00 | 1.22 | 1.41 | 0.86 | 1.12    | 0.05 |
| 144       | Azathioprine         | 1.26 | 1.04 | 0.89 | 0.87 | 0.79 | 0.95    | 0.05 |
| 145       | Sildenafil           | 1.22 | 1.18 | 1.00 | 1.23 | 0.90 | 1.12    | 0.07 |
| 146       | Atovaquone           | 0.97 | 0.95 | 0.16 | 1.43 | 0.91 | 0.96    | 0.05 |
| 147       | Sertaconazole        | 0.98 | 0.87 | 0.77 | 0.94 | 1.11 | 0.80    | 0.06 |
| 148       | Cefepime             | 1.01 | 0.93 | 0.88 | 1.41 | 0.97 | 1.10    | 0.07 |
| 149       | Aripiprazole         | 1.01 | 0.94 | 0.72 | 1.49 | 1.35 | 1.16    | 0.07 |
| 150       | Candesartan          | 0.97 | 1.00 | 0.93 | 1.09 | 1.03 | 1.10    | 0.08 |
| 151       | Butenafine           | 1.04 | 1.06 | 1.29 | 1.56 | 0.91 | 1.11    | 0.06 |
| 152       | Dorzolamide-HCl      | 1.40 | 0.95 | 1.09 | 0.98 | 0.92 | 1.05    | 0.05 |
| 153       | Escitalopram         | 1.53 | 0.87 | 1.05 | 1.22 | 0.96 | 1.02    | 0.05 |
| 154       | Eprosartan mesylate  | 1.12 | 0.80 | 1.06 | 1.12 | 1.01 | 1.02    | 0.06 |
| 155       | Sodium Phenylacetate | 1.06 | 0.88 | 1.20 | 1.15 | 1.00 | 1.07    | 0.07 |
| 156       | Ozagrel              | 1.06 | 0.90 | 0.99 | 1.02 | 0.98 | 1.00    | 0.07 |
| 157       | Entacapone           | 1.18 | 0.87 | 0.79 | 1.37 | 1.08 | 1.12    | 0.09 |
| 158       | Bleomycin            | 0.81 | 0.62 | 0.46 | 0.69 | 0.69 | 0.99    | 0.05 |
| 159       | Bopindolol           | 0.84 | 0.99 | 1.14 | 1.04 | 0.92 | 0.88    | 0.04 |
| 160       | Guanfacine-HCl       | 1.07 | 0.94 | 0.93 | 1.17 | 0.90 | 0.99    | 0.06 |
| 161       | Tizanidine-HCl       | 0.69 | 0.99 | 1.21 | 1.09 | 0.80 | 1.13    | 0.05 |
| 162       | Meglumine            | 0.81 | 0.96 | 1.22 | 1.06 | 0.77 | 1.03    | 0.10 |
| 163       | Propranolol S(-)     | 0.82 | 1.02 | 1.13 | 1.32 | 0.51 | 0.98    | 0.04 |
| 164       | Carvedilol           | 0.81 | 0.86 | 0.94 | 1.63 | 0.98 | NA      | NA   |
| 165       | Cerivastatin         | 0.80 | 0.83 | 0.60 | 0.15 | 0.17 | 0.29    | 0.19 |
| 166       | Aclarubicin          | 0.90 | 0.99 | 1.05 | 0.33 | 0.20 | 0.30    | 0.20 |
| 167       | Flumazenil           | 0.75 | 0.99 | 1.22 | 1.25 | 0.81 | 1.11    | 0.06 |
| 168       | Fenretinide          | 0.91 | 0.84 | 0.91 | 0.03 | 1.58 | NA      | NA   |
| 169       | Gefitinib            | 1.03 | 1.14 | 0.99 | 0.02 | 0.17 | 0.91    | 0.19 |
| 170       | Ibudilast            | 0.79 | 0.95 | 1.41 | 1.07 | 0.94 | 1.02    | 0.15 |

| Comp. No. | Name                 | MTT  |      |      |      |      | Imaging |      |
|-----------|----------------------|------|------|------|------|------|---------|------|
|           |                      | 4    | 24   | 48   | 72   | 120  | 120     |      |
| Method:   | Time (hours):        |      |      |      |      |      | StDev   |      |
| 171       | Imatinib             | 0.86 | 0.99 | 0.95 | 0.47 | 1.31 | 0.13    | 0.03 |
| 172       | Idarubicin           | 0.61 | 0.17 | 0.12 | 0.00 | 0.19 | NA      | NA   |
| 173       | Montelukast          | 1.28 | 1.26 | 1.22 | 1.85 | 0.89 | 1.14    | 0.05 |
| 174       | (R)-(-)-Deprenyl·HCl | 0.79 | 1.01 | 1.12 | 1.35 | 0.69 | 1.21    | 0.05 |
| 175       | Vatalanib            | 0.75 | 0.81 | 0.86 | 1.16 | 0.84 | 0.47    | 0.06 |
| 176       | Fumagillin           | 0.86 | 1.02 | 0.97 | 1.22 | 1.13 | 1.22    | 0.06 |
| 177       | Exemestane           | 0.68 | 1.14 | 1.07 | 1.59 | 1.22 | 1.32    | 0.06 |
| 178       | Dinoprostone         | 0.70 | 0.90 | 0.80 | 0.77 | 0.91 | 0.83    | 0.07 |
| 179       | Metformin            | 0.79 | 0.81 | 1.01 | 1.41 | 1.08 | 1.14    | 0.08 |
| 180       | Anagrelide           | 0.77 | 0.94 | 0.87 | 0.95 | 1.08 | 1.01    | 0.10 |
| 181       | Dofetilide           | 0.76 | 1.04 | 1.04 | 1.47 | 0.95 | 1.26    | 0.08 |
| 182       | Erlotinib            | 0.76 | 1.04 | 1.12 | 1.30 | 0.97 | 1.27    | 0.07 |
| 183       | Lobeline             | 0.67 | 1.23 | 0.96 | 1.31 | 0.94 | 1.09    | 0.23 |
| 184       | Melatonin            | 0.97 | 0.85 | 1.06 | 1.26 | 0.87 | 1.27    | 0.06 |
| 185       | Dinoprost            | 1.04 | 0.80 | 0.90 | 0.75 | 0.87 | 0.93    | 0.04 |
| 186       | HA1077               | 0.67 | 0.89 | 0.95 | 0.96 | 1.19 | 0.68    | 0.04 |
| 187       | Hydroxytacrine       | 0.77 | 1.00 | 1.05 | 1.32 | 0.92 | 1.14    | 0.13 |
| 188       | Oxotremorine         | 0.76 | 1.00 | 0.85 | 1.24 | 0.99 | 0.81    | 0.08 |
| 189       | Tacrine              | 0.95 | 1.04 | 1.08 | 1.40 | 1.10 | 0.89    | 0.06 |
| 190       | Gallamine            | 0.76 | 1.05 | 1.07 | 1.08 | 1.06 | 1.07    | 0.10 |
| 191       | Galanthamine         | 0.88 | 1.16 | 1.04 | 1.13 | 0.95 | 1.20    | 0.08 |
| 192       | Amiloride            | 0.79 | 1.24 | 1.12 | 1.01 | 1.02 | 1.22    | 0.06 |
| 193       | Amlodipine           | 0.79 | 1.11 | 0.73 | 1.36 | 0.92 | 1.19    | 0.07 |
| 194       | Diltiazem            | 0.80 | 1.13 | 1.17 | 0.97 | 0.96 | 1.30    | 0.18 |
| 195       | Nifedipine           | 0.84 | 1.09 | 0.98 | 1.48 | 1.18 | 1.01    | 0.10 |
| 196       | Nimodipine           | 0.94 | 1.00 | 1.17 | 1.60 | 1.59 | 1.31    | 0.06 |
| 197       | Nitrendipine         | 0.95 | 1.07 | 1.02 | 1.41 | 1.18 | 1.29    | 0.06 |
| 198       | Verapamil            | 0.73 | 0.83 | 0.84 | 1.17 | 1.05 | 1.07    | 0.04 |
| 199       | Niguldipine          | 0.72 | 0.83 | 0.98 | 0.01 | 0.20 | NA      | NA   |
| 200       | Flunarizine·2HCl     | 0.77 | 0.93 | 0.98 | 0.24 | 1.16 | 1.06    | 0.08 |
| 201       | Gabapentin           | 1.06 | 0.98 | 0.89 | 1.17 | 0.79 | 1.19    | 0.07 |
| 202       | Felodipine           | 1.18 | 1.19 | 1.12 | 1.43 | 1.06 | 1.14    | 0.11 |
| 203       | Cilnidipine          | 1.38 | 1.32 | 1.18 | 2.35 | 1.48 | 0.79    | 0.07 |
| 204       | Phenoxybenzamine·HCl | 0.91 | 0.98 | 0.88 | 1.00 | 0.87 | 1.26    | 0.07 |
| 205       | Trifluoperazine·2HCl | 0.91 | 0.76 | 0.79 | 1.40 | 0.94 | NA      | NA   |
| 206       | Denbufylline         | 0.85 | 1.11 | 0.84 | 1.08 | 0.90 | 0.97    | 0.26 |
| 207       | Miltefosine          | 1.21 | 0.96 | 0.82 | 1.04 | 1.40 | 1.05    | 0.10 |
| 208       | Latanoprost          | 0.87 | 0.92 | 0.85 | 1.08 | 0.98 | 1.13    | 0.05 |
| 209       | Ouabain              | 0.22 | 0.17 | 0.11 | 0.02 | 0.13 | 0.36    | 0.02 |
| 210       | Cloпамide            | 0.82 | 0.97 | 0.73 | 1.05 | 0.87 | 1.14    | 0.06 |
| 211       | Molsidomine          | 0.95 | 0.97 | 1.04 | 1.22 | 0.78 | 1.24    | 0.10 |
| 212       | Pravadoline          | 1.08 | 0.91 | 0.92 | 1.28 | 1.23 | 1.31    | 0.07 |
| 213       | Tranilast            | 0.85 | 1.04 | 1.03 | 1.35 | 0.96 | 1.07    | 0.27 |

| Comp. No.                | Name                   | MTT  |      |      |      |      | Imaging |      |
|--------------------------|------------------------|------|------|------|------|------|---------|------|
|                          |                        | 4    | 24   | 48   | 72   | 120  | 120     |      |
| Method:<br>Time (hours): |                        |      |      |      |      |      | StDev   |      |
| 214                      | Alfuzosin              | 0.97 | 1.00 | 0.94 | 1.08 | 0.93 | 1.14    | 0.08 |
| 215                      | Bromocriptine mesylate | 1.25 | 1.29 | 1.19 | 2.01 | 1.23 | 0.69    | 0.06 |
| 216                      | Clozapine              | 0.99 | 0.87 | 0.87 | 1.16 | 0.97 | 1.08    | 0.08 |
| 217                      | Clothiapine            | 1.00 | 0.91 | 0.87 | 1.42 | 1.14 | 1.09    | 0.06 |
| 218                      | Acitretin              | 0.95 | 1.09 | 0.74 | 0.80 | 0.81 | 0.49    | 0.08 |
| 219                      | Remoxipride            | 0.83 | 1.10 | 1.02 | 0.98 | 0.94 | 1.17    | 0.06 |
| 220                      | Calcifediol            | 0.99 | 0.98 | 0.87 | 0.80 | 1.65 | 0.30    | 0.06 |
| 221                      | Calcitriol             | 1.11 | 1.23 | 1.01 | 1.79 | 1.70 | 0.89    | 0.13 |
| 222                      | Ketoconazole           | 0.94 | 0.88 | 0.41 | 0.05 | 0.17 | 0.74    | 0.05 |
| 223                      | Oxatomide              | 1.03 | 0.97 | 0.81 | 0.52 | 1.07 | 1.15    | 0.05 |
| 224                      | Disodium Cromoglycate  | 0.98 | 0.80 | 0.82 | 1.18 | 0.85 | 1.14    | 0.05 |
| 225                      | Capsaicin              | 0.92 | 1.09 | 0.95 | 1.51 | 0.86 | 1.31    | 0.08 |
| 226                      | Dexamethasone          | 1.04 | 1.10 | 1.24 | 1.33 | 0.91 | 0.73    | 0.06 |
| 227                      | Dipyridamole           | 1.07 | 1.19 | 1.24 | 1.44 | 1.19 | 1.23    | 0.05 |
| 228                      | Ethacrynic Acid        | 1.12 | 1.03 | 0.89 | 1.25 | 1.39 | 1.15    | 0.14 |
| 229                      | Indomethacin           | 1.11 | 1.00 | 0.95 | 1.30 | 1.06 | 1.19    | 0.07 |
| 230                      | Naproxen               | 0.92 | 1.01 | 0.90 | 1.41 | 0.86 | 1.24    | 0.12 |
| 231                      | Clofibrate             | 0.85 | 0.92 | 0.90 | 1.25 | 0.94 | 1.10    | 0.06 |
| 232                      | Ibuprofen              | 0.95 | 0.98 | 1.01 | 1.25 | 0.97 | 1.26    | 0.06 |
| 233                      | Benserazide            | 1.07 | 0.99 | 0.96 | 1.14 | 0.93 | 1.04    | 0.04 |
| 234                      | Debrisoquin            | 0.97 | 1.36 | 0.91 | 1.19 | 0.89 | 1.14    | 0.09 |
| 235                      | Actarit                | 0.96 | 1.09 | 1.03 | 1.07 | 0.96 | 0.99    | 0.09 |
| 236                      | Bumetanide             | 1.19 | 1.10 | 1.19 | 1.20 | 0.91 | 0.87    | 0.04 |
| 237                      | Neomycin               | 0.90 | 1.44 | 1.01 | 1.22 | 0.97 | 1.10    | 0.05 |
| 238                      | Auranofin              | 0.89 | 0.34 | 0.14 | 0.02 | 0.15 | 0.23    | 0.09 |
| 239                      | Captopril              | 1.03 | 1.17 | 0.85 | 1.16 | 1.07 | 1.03    | 0.05 |
| 240                      | Docebenone             | 1.17 | 1.13 | 0.87 | 0.93 | 1.37 | 1.34    | 0.06 |
| 241                      | Tranlycypromine        | 0.60 | 0.81 | 0.86 | 0.85 | 0.85 | 0.98    | 0.06 |
| 242                      | Piroxicam              | 0.63 | 0.92 | 0.88 | 1.24 | 1.01 | 1.21    | 0.07 |
| 243                      | Moxifloxacin-HCl       | 0.67 | 0.84 | 0.92 | 1.21 | 1.07 | 1.15    | 0.10 |
| 244                      | Troleandomycin         | 0.69 | 0.90 | 1.05 | 1.08 | 1.07 | 1.02    | 0.08 |
| 245                      | Carbidopa              | 0.76 | 0.90 | 0.90 | 0.84 | 0.99 | 0.92    | 0.11 |
| 246                      | Nimesulide             | 0.72 | 0.86 | 0.96 | 1.14 | 1.10 | 1.14    | 0.07 |
| 247                      | Ketoprofen             | 0.67 | 0.80 | 1.06 | 1.15 | 1.00 | 1.16    | 0.09 |
| 248                      | Meloxicam              | 0.62 | 0.80 | 0.97 | 1.39 | 1.00 | 1.13    | 0.08 |
| 249                      | Terbinafine            | 0.55 | 0.85 | 1.07 | 1.37 | 0.70 | 0.94    | 0.10 |
| 250                      | Sodium Phenylbutyrate  | 0.85 | 0.75 | 1.12 | 1.03 | 0.95 | 0.78    | 0.05 |
| 251                      | Ergothioneine          | 0.68 | 0.91 | 0.93 | 0.99 | 0.77 | 1.08    | 0.07 |
| 252                      | Ambroxol               | 0.86 | 0.83 | 0.97 | 1.27 | 0.89 | 0.91    | 0.07 |
| 253                      | Idebenone              | 1.00 | 1.10 | 1.00 | 1.43 | 1.02 | 1.32    | 0.08 |
| 254                      | Mevastatin             | 1.28 | 0.99 | 1.19 | 0.98 | 0.55 | 0.59    | 0.10 |
| 255                      | Simvastatin            | 0.77 | 0.89 | 0.81 | 0.68 | 0.35 | 0.49    | 0.03 |
| 256                      | Suramin                | 0.59 | 0.95 | 1.02 | 1.16 | 0.94 | 1.06    | 0.06 |

| Comp. No. | Name                   | MTT  |      |      |      |      | Imaging |      |
|-----------|------------------------|------|------|------|------|------|---------|------|
|           |                        | 4    | 24   | 48   | 72   | 120  | 120     |      |
| Method:   | Time (hours):          |      |      |      |      |      | StDev   |      |
| 257       | Goserelin              | 0.64 | 0.88 | 1.09 | 1.03 | 1.16 | 1.11    | 0.08 |
| 258       | Guaiacol               | 0.69 | 0.95 | 0.97 | 1.42 | 1.01 | 0.85    | 0.09 |
| 259       | Retinoic Acid          | 0.82 | 0.63 | 0.59 | 0.78 | 0.72 | 0.56    | 0.12 |
| 260       | Troglitazone           | 1.00 | 0.87 | 1.15 | 1.55 | 1.46 | 0.98    | 0.12 |
| 261       | Bezafibrate            | 1.66 | 0.89 | 1.16 | 1.23 | 1.05 | 1.13    | 0.07 |
| 262       | Raloxifene             | 1.72 | 1.24 | 1.00 | 0.30 | 1.60 | NA      | NA   |
| 263       | Camptothecin           | 0.76 | 0.21 | 0.18 | 0.02 | 0.15 | NA      | NA   |
| 264       | Plicamycin             | 1.42 | 0.17 | 0.21 | 0.02 | 0.14 | NA      | NA   |
| 265       | Rifampicin             | 1.08 | 1.09 | 1.35 | 0.02 | 0.94 | 0.93    | 0.06 |
| 266       | Etoposide              | 0.72 | 0.45 | 0.36 | 0.30 | 0.57 | 0.96    | 0.07 |
| 267       | Mitomycin C            | 0.81 | 0.28 | 0.18 | 0.40 | 0.15 | 0.99    | 0.08 |
| 268       | Puromycin              | 0.48 | 0.15 | 0.13 | 0.02 | 0.16 | 0.18    | 0.14 |
| 269       | Delavirdine mesylate   | 0.80 | 0.95 | 1.00 | 0.62 | 1.07 | 1.19    | 0.10 |
| 270       | 10-Hydroxycamptothecin | 0.62 | 0.16 | 0.14 | 0.02 | 0.15 | 0.31    | 0.02 |
| 271       | Daunorubicin           | 0.79 | 0.11 | 0.13 | 0.01 | 0.14 | 0.12    | 0.07 |
| 272       | Doxorubicin·HCl        | 1.10 | 0.15 | 0.15 | 0.02 | 0.16 | 0.14    | 0.07 |
| 273       | Cetirizine 2HCl        | 1.30 | 0.46 | 0.52 | 0.93 | 0.87 | 1.20    | 0.07 |
| 274       | Lapatinib ditosylate   | 1.29 | 1.34 | 1.22 | 1.50 | 0.97 | 0.56    | 0.06 |
| 275       | Methyl salicylate      | 0.87 | 0.93 | 1.16 | 0.96 | 1.03 | 1.08    | 0.06 |
| 276       | Pioglitazone           | 0.79 | 0.83 | 0.89 | 1.21 | 1.06 | 1.27    | 0.07 |
| 277       | Pranlukast             | 1.13 | 1.25 | 1.64 | 1.06 | 0.96 | 1.06    | 0.15 |
| 278       | Rivastigmine           | 0.88 | 0.82 | 1.08 | 1.36 | 1.02 | 1.16    | 0.07 |
| 279       | Rofecoxib              | 0.80 | 0.81 | 1.08 | 1.34 | 1.13 | 1.19    | 0.08 |
| 280       | Ergotamine             | 0.84 | 1.00 | 1.03 | 1.76 | 1.17 | 1.09    | 0.09 |
| 281       | Sulindac               | 0.97 | 0.96 | 0.61 | 0.79 | 0.71 | 0.96    | 0.06 |
| 282       | Valproic acid          | 0.89 | 1.46 | 0.71 | 0.94 | 1.05 | 1.04    | 0.07 |
| 283       | Calcipotriene          | 0.89 | 1.08 | 1.20 | 1.77 | 1.90 | 0.94    | 0.06 |
| 284       | Zafirlukast            | 1.05 | 1.15 | 0.74 | 1.17 | 1.47 | 1.16    | 0.07 |
| 285       | Zileuton               | 0.85 | 0.84 | 0.80 | 1.11 | 1.08 | 1.11    | 0.11 |
| 286       | Pentamidine            | 0.92 | 0.95 | 0.56 | 0.92 | 0.93 | 0.47    | 0.07 |
| 287       | Bortezomib             | 0.83 | 0.26 | 0.39 | 0.02 | 0.17 | 0.22    | 0.02 |
| 288       | Bambuterol             | 0.92 | 0.91 | 0.75 | 1.18 | 1.10 | 1.01    | 0.08 |
| 289       | Fentiazac              | 0.90 | 0.97 | 0.84 | 1.15 | 1.27 | 0.41    | 0.05 |
| 290       | Mephénytoin            | 0.93 | 1.00 | 0.98 | 1.01 | 1.16 | 1.08    | 0.07 |
| 291       | Diazoxide              | 1.14 | 1.01 | 0.58 | 1.13 | 0.80 | 1.02    | 0.06 |
| 292       | Glyburide              | 1.03 | 1.07 | 0.65 | 1.58 | 1.20 | 1.29    | 0.10 |
| 293       | Minoxidil              | 0.94 | 0.96 | 0.59 | 1.22 | 1.08 | 1.10    | 0.11 |
| 294       | Tolazamide             | 1.03 | 1.08 | 0.71 | 1.04 | 0.92 | 1.03    | 0.10 |
| 295       | Nicorandil             | 0.89 | 1.03 | 0.79 | 1.21 | 1.01 | 1.03    | 0.08 |
| 296       | Bexarotene             | 1.12 | 0.84 | 0.62 | 1.23 | 1.08 | 0.91    | 0.09 |
| 297       | Tranexamic acid        | 0.89 | 0.21 | 0.32 | 0.97 | 1.10 | 1.03    | 0.10 |
| 298       | Celecoxib              | 1.03 | 0.93 | 0.55 | 1.48 | 1.23 | 1.16    | 0.07 |
| 299       | Levetiracetam          | 1.05 | 0.81 | 0.60 | 0.94 | 1.08 | 1.07    | 0.07 |

| Comp. No. | Name                              | MTT  |      |      |      |      | Imaging |       |
|-----------|-----------------------------------|------|------|------|------|------|---------|-------|
|           |                                   | 4    | 24   | 48   | 72   | 120  | 120     | StDev |
| 300       | Letrozole                         | 1.15 | 0.87 | 0.71 | 1.02 | 1.24 | 1.06    | 0.10  |
| 301       | Abamectin                         | 1.47 | 0.42 | 0.55 | 0.01 | 0.16 | 0.30    | 0.02  |
| 302       | Alfacalcidol                      | 1.05 | 1.04 | 1.51 | 1.68 | 1.43 | 1.19    | 0.08  |
| 303       | Anethole-trithione                | 1.20 | 0.97 | 0.85 | 1.06 | 0.96 | 1.24    | 0.08  |
| 304       | Anastrozole                       | 0.85 | 1.00 | 1.17 | 1.02 | 1.00 | 0.95    | 0.08  |
| 305       | Bicalutamide                      | 0.95 | 1.16 | 0.87 | 1.38 | 1.21 | 1.21    | 0.08  |
| 306       | Clodronic acid                    | 0.93 | 1.04 | 0.71 | 0.89 | 1.17 | 0.76    | 0.09  |
| 307       | Clindamycin palmitate·HCl         | 1.01 | 0.95 | 0.64 | 0.81 | 1.09 | 0.81    | 0.05  |
| 308       | Vorinostat                        | 0.91 | 0.81 | 0.40 | 1.16 | 0.49 | NA      | NA    |
| 309       | Didanosine                        | 0.92 | 0.88 | 0.54 | 1.04 | 1.21 | 1.08    | 0.13  |
| 310       | Dolasetron                        | 0.82 | 1.00 | 0.62 | 1.01 | 1.12 | 1.08    | 0.08  |
| 311       | Enalaprilat                       | 0.87 | 1.06 | 1.02 | 1.13 | 0.92 | 1.00    | 0.12  |
| 312       | Fluvastatin                       | 1.05 | 0.80 | 0.65 | 0.32 | 0.21 | NA      | NA    |
| 313       | Fosinopril                        | 0.86 | 0.86 | 1.06 | 1.07 | 0.97 | 1.09    | 0.06  |
| 314       | Gemcitabine                       | 0.84 | 0.59 | 0.59 | 0.35 | 0.46 | 0.97    | 0.06  |
| 315       | Ginkgolide A                      | 1.08 | 0.91 | 1.41 | 1.10 | 1.04 | 0.97    | 0.07  |
| 316       | Granisetron                       | 1.35 | 0.98 | 1.46 | 1.08 | 1.03 | 0.70    | 0.04  |
| 317       | Nedaplatin                        | 1.11 | 0.95 | 0.86 | 0.96 | 1.00 | 1.05    | 0.14  |
| 318       | Oxaliplatin                       | 1.21 | 0.79 | 0.51 | 0.68 | 0.63 | 1.03    | 0.25  |
| 319       | Anethole, trans-                  | 0.90 | 0.81 | 0.74 | 0.88 | 1.07 | 1.11    | 0.08  |
| 320       | Atazanavir                        | 1.01 | 0.90 | 1.02 | 1.01 | 1.18 | 0.33    | 0.03  |
| 321       | Mycophenolate mofetil             | 0.74 | 0.67 | 0.80 | 1.02 | 0.69 | 0.88    | 0.14  |
| 322       | Etoricoxib                        | 0.76 | 0.54 | 0.48 | 1.43 | 1.10 | 1.21    | 0.11  |
| 323       | Clofarabine                       | 0.61 | 0.54 | 0.53 | 0.48 | 0.85 | 0.76    | 0.06  |
| 324       | Cabergoline                       | 0.68 | 0.81 | 1.03 | 1.71 | 1.12 | 1.23    | 0.10  |
| 325       | Dilazep                           | 0.66 | 0.90 | 1.22 | 1.58 | 1.09 | 1.17    | 0.10  |
| 326       | Ibandronate                       | 0.85 | 1.02 | 1.04 | 1.21 | 0.51 | 1.14    | 0.10  |
| 327       | Imipenem                          | 0.83 | 0.89 | 0.98 | 1.50 | 0.94 | 1.27    | 0.12  |
| 328       | Lomustine                         | 0.88 | 0.99 | 0.92 | 1.54 | 0.93 | 1.16    | 0.12  |
| 329       | Adapalene                         | 0.78 | 0.46 | 0.43 | 0.50 | 0.43 | 0.64    | 0.16  |
| 330       | Lomerizine                        | 0.73 | 0.89 | 1.01 | 0.51 | 1.08 | 0.96    | 0.11  |
| 331       | Lofexidine·HCl                    | 0.76 | 0.91 | 1.14 | 1.28 | 0.93 | 1.17    | 0.10  |
| 332       | Meropenem                         | 0.80 | 0.79 | 1.00 | 1.39 | 1.06 | 0.93    | 0.26  |
| 333       | Nifekalant                        | 0.86 | 1.09 | 1.02 | 1.54 | 1.14 | 1.26    | 0.11  |
| 334       | Octreotide                        | 0.84 | 1.25 | 1.25 | 1.32 | 1.05 | 1.26    | 0.14  |
| 335       | Oseltamivir                       | 0.80 | 0.99 | 1.20 | 1.39 | 1.08 | 1.22    | 0.10  |
| 336       | Pamidronate·2Na·5H <sub>2</sub> O | 0.82 | 0.91 | 0.95 | 1.37 | 1.16 | 1.20    | 0.11  |
| 337       | Pramipexole                       | 0.87 | 0.76 | 0.70 | 1.27 | 1.05 | 1.16    | 0.12  |
| 338       | Triptorelin                       | 0.73 | 0.50 | 0.43 | 1.46 | 1.21 | 1.16    | 0.18  |
| 339       | Rifamycin SV                      | 0.80 | 0.96 | 0.87 | 2.23 | 1.30 | 0.87    | 0.34  |
| 340       | Risedronic acid                   | 0.87 | 0.86 | 0.85 | 0.81 | 0.36 | 1.18    | 0.15  |
| 341       | Rocuronium bromide                | 0.74 | 0.87 | 1.40 | 1.38 | 1.00 | 1.18    | 0.14  |
| 342       | Ricobendazole                     | 0.93 | 0.74 | 0.69 | 0.61 | 0.62 | 1.20    | 0.10  |



| Comp. No. | Name                       | MTT  |      |      |      |      | Imaging |      |
|-----------|----------------------------|------|------|------|------|------|---------|------|
|           |                            | 4    | 24   | 48   | 72   | 120  | 120     |      |
| Method:   | Time (hours):              |      |      |      |      |      | StDev   |      |
| 343       | Sulbactam                  | 0.91 | 0.99 | 0.92 | 1.46 | 1.01 | 1.30    | 0.12 |
| 344       | Thiamphenicol glycinate    | 1.03 | 1.13 | 1.14 | 1.32 | 1.16 | 1.15    | 0.15 |
| 345       | Tulobuterol                | 0.96 | 0.93 | 0.95 | 0.91 | 0.94 | 1.18    | 0.12 |
| 346       | Vinorelbine                | 0.62 | 0.76 | 0.39 | 0.58 | 0.51 | 0.59    | 0.06 |
| 347       | Vindesine sulfate          | 0.69 | 0.59 | 0.35 | 0.57 | 0.46 | 0.80    | 0.09 |
| 348       | Salmeterol xinafoate       | 0.59 | 0.45 | 0.18 | 0.01 | 0.24 | 0.10    | 0.04 |
| 349       | Vincristine sulfate        | 0.81 | 0.78 | 0.40 | 0.54 | 0.45 | 0.79    | 0.07 |
| 350       | Acemetacin                 | 0.77 | 0.86 | 0.99 | 1.32 | 1.07 | 1.32    | 0.11 |
| 351       | Acetylsalicylic Acid       | 1.33 | 1.00 | 0.94 | 1.30 | 1.00 | 1.26    | 0.11 |
| 352       | Acipimox                   | 1.40 | 0.88 | 1.14 | 1.29 | 1.05 | 1.13    | 0.11 |
| 353       | Aceclofenac                | 1.21 | 1.03 | 1.07 | 1.54 | 1.05 | 1.31    | 0.11 |
| 354       | Acycloguanosine            | 1.16 | 1.06 | 0.92 | 1.42 | 1.03 | 1.29    | 0.17 |
| 355       | 3'-Azido-3'-deoxythymidine | 0.94 | 1.10 | 1.04 | 1.36 | 0.97 | 1.23    | 0.13 |
| 356       | Allopurinol                | 1.09 | 0.90 | 1.02 | 1.28 | 0.97 | 1.24    | 0.11 |
| 357       | Alendronate                | 1.01 | 1.04 | 0.86 | 1.33 | 0.93 | 1.19    | 0.10 |
| 358       | Altretamine                | 1.09 | 1.10 | 0.87 | 1.26 | 0.86 | 1.22    | 0.10 |
| 359       | Albendazole                | 0.91 | 0.58 | 0.40 | 0.57 | 0.59 | 1.04    | 0.13 |
| 360       | Sumatriptan Succinate      | 1.20 | 0.97 | 1.03 | 1.10 | 1.04 | 1.17    | 0.10 |
| 361       | Amifostine                 | 0.83 | 0.99 | 0.81 | 1.19 | 1.34 | 1.01    | 0.13 |
| 362       | DL-Aminoglutethimide       | 0.83 | 0.87 | 0.80 | 1.30 | 1.07 | 1.25    | 0.11 |
| 363       | 4-Aminosalicylic acid      | 0.99 | 0.91 | 0.79 | 1.43 | 1.10 | 1.34    | 0.15 |
| 364       | 5-Aminosalicylic acid      | 1.00 | 0.90 | 0.85 | 1.30 | 1.15 | 1.27    | 0.11 |
| 365       | Ampicillin                 | 0.93 | 0.99 | 0.78 | 1.37 | 1.11 | 1.05    | 0.14 |
| 366       | Ampiroxicam                | 1.04 | 0.93 | 0.81 | 1.50 | 1.16 | 1.11    | 0.31 |
| 367       | Apramycin                  | 1.15 | 0.95 | 0.73 | 1.23 | 0.98 | 1.18    | 0.11 |
| 368       | Artemisinin                | 1.47 | 1.07 | 1.00 | 1.56 | 1.38 | 1.26    | 0.11 |
| 369       | Atenolol                   | 0.90 | 1.02 | 0.93 | 1.26 | 1.02 | 1.21    | 0.13 |
| 370       | Atracurium besylate        | 0.92 | 0.89 | 0.88 | 1.59 | 0.99 | 1.24    | 0.10 |
| 371       | Azaperone                  | 1.04 | 0.86 | 0.88 | 1.72 | 1.03 | 1.27    | 0.11 |
| 372       | Vinblastine                | 1.14 | 0.50 | 0.30 | 0.07 | 0.23 | 0.29    | 0.29 |
| 373       | Azithromycin               | 1.12 | 0.86 | 0.91 | 1.80 | 1.27 | 1.10    | 0.14 |
| 374       | Aztreonam                  | 0.99 | 0.83 | 0.94 | 1.36 | 1.09 | 1.17    | 0.17 |
| 375       | Betamethasone              | 1.49 | 1.02 | 1.17 | 1.46 | 1.23 | 0.94    | 0.13 |
| 376       | Bifonazole                 | 0.99 | 0.79 | 0.92 | 0.85 | 1.75 | 0.72    | 0.10 |
| 377       | Bisacodyl                  | 0.90 | 0.91 | 0.78 | 1.11 | 1.54 | 0.92    | 0.21 |
| 378       | Bromhexine                 | 0.74 | 1.00 | 0.77 | 1.74 | 1.07 | 0.95    | 0.09 |
| 379       | Buspirone                  | 1.04 | 1.02 | 1.21 | 2.04 | 1.44 | 1.31    | 0.11 |
| 380       | Canrenone                  | 0.93 | 1.08 | 0.99 | 1.89 | 1.88 | 1.07    | 0.09 |
| 381       | Carbadox                   | 0.80 | 0.43 | 0.86 | 1.41 | 1.05 | 1.33    | 0.18 |
| 382       | Carboplatin                | 0.83 | 0.77 | 0.66 | 0.75 | 0.36 | 0.55    | 0.09 |
| 383       | Carbamazepine              | 0.92 | 0.95 | 0.90 | 1.60 | 1.01 | 1.21    | 0.16 |
| 384       | Cefoperazone acid          | 0.99 | 0.88 | 1.57 | 1.41 | 1.05 | 1.30    | 0.15 |
| 385       | Cefotaxime Acid            | 1.08 | 0.92 | 1.08 | 1.19 | 1.15 | 1.30    | 0.13 |

| Comp. No. | Name                    | MTT  |      |      |      |      | Imaging |      |
|-----------|-------------------------|------|------|------|------|------|---------|------|
|           |                         | 4    | 24   | 48   | 72   | 120  | 120     |      |
| Method:   | Time (hours):           |      |      |      |      |      | StDev   |      |
| 386       | Ceftazidime             | 1.05 | 0.84 | 0.77 | 1.22 | 1.22 | 0.99    | 0.08 |
| 387       | Chloramphenicol         | 0.94 | 1.12 | 0.83 | 1.23 | 1.21 | 1.34    | 0.11 |
| 388       | Chlormadinone Acetate   | 1.05 | 1.14 | 0.85 | 2.16 | 2.03 | 0.97    | 0.12 |
| 389       | Chlorambucil            | 0.99 | 0.73 | 0.68 | 1.02 | 0.62 | 0.90    | 0.44 |
| 390       | Chlorpheniramine        | 0.83 | 0.94 | 0.68 | 1.06 | 0.94 | 1.08    | 0.09 |
| 391       | Chloroquine             | 0.83 | 1.27 | 0.94 | 0.03 | 1.32 | 1.09    | 0.14 |
| 392       | Thalidomide             | 0.90 | 1.09 | 1.24 | 1.29 | 1.03 | 0.77    | 0.24 |
| 393       | Ciprofloxacin           | 1.11 | 1.05 | 0.84 | 1.39 | 1.06 | 0.98    | 0.08 |
| 394       | Citalopram              | 0.91 | 0.86 | 1.02 | 1.38 | 1.06 | 0.99    | 0.08 |
| 395       | Clarithromycin          | 0.99 | 1.08 | 0.87 | 1.14 | 1.08 | 1.01    | 0.08 |
| 396       | Climbazole              | 1.04 | 0.97 | 0.83 | 1.62 | 1.18 | 1.26    | 0.12 |
| 397       | Clinafloxacin           | 0.93 | 1.00 | 1.00 | 1.20 | 1.10 | 1.00    | 0.08 |
| 398       | Clomiphene              | 0.94 | 0.74 | 0.56 | 0.98 | 0.97 | NA      | NA   |
| 399       | Amisulpride             | 0.90 | 0.83 | 0.87 | 1.19 | 1.05 | 1.07    | 0.09 |
| 400       | Clopidogrel             | 0.95 | 0.92 | 0.97 | 1.25 | 0.92 | 1.10    | 0.10 |
| 401       | Clobetasol Propionate   | 1.26 | 1.30 | 1.22 | 1.94 | 1.59 | 1.28    | 0.10 |
| 402       | Orphenadrine citrate    | 0.97 | 0.83 | 0.81 | 1.33 | 0.98 | 1.01    | 0.08 |
| 403       | Corticosterone          | 0.85 | 1.06 | 0.84 | 2.12 | 1.44 | 1.10    | 0.19 |
| 404       | Crotamiton              | 1.12 | 0.96 | 0.89 | 1.11 | 1.11 | 1.28    | 0.10 |
| 405       | Cyclophosphamide        | 1.02 | 0.99 | 0.86 | 1.04 | 1.00 | 1.22    | 0.09 |
| 406       | Cyproterone Acetate     | 1.36 | 1.04 | 1.18 | 1.75 | 1.74 | 1.39    | 0.11 |
| 407       | Cyclocytidine           | 1.31 | 0.86 | 0.93 | 0.90 | 0.59 | 0.22    | 0.04 |
| 408       | Cytarabine              | 1.15 | 0.84 | 0.88 | 0.77 | 0.65 | 0.19    | 0.04 |
| 409       | Dacarbazine             | 0.99 | 0.91 | 0.74 | 1.18 | 0.93 | 0.82    | 0.06 |
| 410       | Danazol                 | 1.24 | 0.93 | 0.84 | 1.02 | 1.31 | 1.10    | 0.08 |
| 411       | Dehydroepiandrosterone  | 1.24 | 1.22 | 1.12 | 2.29 | 1.11 | 1.24    | 0.10 |
| 412       | Desloratadine           | 0.75 | 0.88 | 0.71 | 1.63 | 1.21 | 1.07    | 0.31 |
| 413       | Dextromethorphan        | 0.95 | 0.93 | 1.01 | 1.36 | 1.05 | 1.18    | 0.11 |
| 414       | Diclofenac              | 1.12 | 0.97 | 0.73 | 1.49 | 1.17 | 1.40    | 0.11 |
| 415       | 2',3' - Dideoxycytidine | 1.34 | 0.89 | 0.99 | 1.31 | 1.02 | 0.94    | 0.08 |
| 416       | Diethylstilbestrol      | 0.95 | 0.91 | 0.64 | 1.38 | 1.44 | 0.57    | 0.04 |
| 417       | Diflunisal              | 1.05 | 0.91 | 0.99 | 1.78 | 1.01 | 1.46    | 0.11 |
| 418       | Disulfiram              | 0.92 | 0.72 | 0.78 | 0.07 | 1.21 | 0.39    | 0.08 |
| 419       | Doxazosin               | 0.95 | 0.96 | 0.85 | 2.23 | 1.36 | 0.51    | 0.27 |
| 420       | Doxifluridine           | 0.96 | 0.92 | 0.74 | 0.73 | 1.07 | 1.21    | 0.12 |
| 421       | Doxofylline             | 0.83 | 1.00 | 1.04 | 1.35 | 0.93 | 1.26    | 0.13 |
| 422       | Doxycycline             | 0.91 | 0.88 | 1.04 | 1.16 | 0.95 | 1.05    | 0.17 |
| 423       | Enalapril               | 0.86 | 1.00 | 1.03 | 1.37 | 1.00 | 1.25    | 0.09 |
| 424       | Enoxacin                | 0.99 | 1.12 | 0.83 | 1.25 | 1.14 | 1.42    | 0.12 |
| 425       | Enrofloxacin            | 0.94 | 0.96 | 0.81 | 1.29 | 1.18 | 1.23    | 0.11 |
| 426       | Ethisterone             | 1.04 | 1.04 | 0.98 | 1.69 | 1.15 | 1.30    | 0.11 |
| 427       | Esomeprazole            | 1.09 | 0.89 | 0.82 | 1.53 | 1.09 | 0.98    | 0.08 |
| 428       | Estradiol               | 1.16 | 1.07 | 0.85 | 1.51 | 1.21 | 1.37    | 0.10 |

| Comp. No. | Name                      | MTT  |      |      |      |      | Imaging |      |
|-----------|---------------------------|------|------|------|------|------|---------|------|
|           |                           | 4    | 24   | 48   | 72   | 120  | 120     |      |
| Method:   | Time (hours):             |      |      |      |      |      | StDev   |      |
| 429       | Estriol                   | 1.04 | 0.91 | 0.95 | 1.61 | 1.14 | 1.19    | 0.12 |
| 430       | Estrone                   | 1.11 | 1.08 | 0.99 | 1.83 | 1.31 | 1.41    | 0.12 |
| 431       | Etidronate                | 0.95 | 0.89 | 0.66 | 1.28 | 0.96 | 1.23    | 0.09 |
| 432       | Etretinate                | 1.09 | 0.81 | 0.95 | 1.33 | 0.91 | 0.96    | 0.12 |
| 433       | Trichloromethiazide       | 1.12 | 1.02 | 0.93 | 1.28 | 0.95 | 1.37    | 0.11 |
| 434       | Famciclovir               | 1.19 | 0.95 | 1.10 | 1.42 | 0.98 | 1.30    | 0.11 |
| 435       | Fenbendazole              | 0.93 | 0.59 | 0.33 | 0.63 | 0.45 | 1.01    | 0.08 |
| 436       | Fenbufen                  | 0.90 | 1.32 | 0.77 | 1.43 | 1.00 | 1.12    | 0.08 |
| 437       | Fenoldopam·HCl            | 0.98 | 1.44 | 1.13 | 1.55 | 1.11 | 1.40    | 0.17 |
| 438       | Fenoprofen                | 0.97 | 1.21 | 1.15 | 1.34 | 1.09 | 1.34    | 0.10 |
| 439       | Fenofibrate               | 0.97 | 1.52 | 0.89 | 1.58 | 1.10 | 1.36    | 0.10 |
| 440       | Finasteride               | 1.08 | 1.07 | 1.03 | 2.06 | 1.50 | 1.47    | 0.11 |
| 441       | 5-Fluorouracil            | 1.05 | 0.78 | 1.03 | 0.54 | 1.04 | 1.15    | 0.09 |
| 442       | Flurbiprofen              | 1.02 | 0.99 | 1.20 | 1.45 | 1.04 | 1.42    | 0.11 |
| 443       | Fleroxacin                | 0.97 | 0.96 | 0.89 | 1.28 | 1.13 | 1.52    | 0.12 |
| 444       | Amitriptyline·HCl         | 0.91 | 0.98 | 0.82 | 1.62 | 1.22 | 1.03    | 0.11 |
| 445       | Floxuridine               | 0.76 | 0.75 | 0.74 | 0.66 | 0.97 | 1.24    | 0.09 |
| 446       | Fluocinolone acetonide    | 0.93 | 1.04 | 0.99 | 1.53 | 1.28 | 0.98    | 0.07 |
| 447       | Flubendazole              | 0.99 | 0.75 | 0.43 | 0.69 | 0.68 | 0.73    | 0.07 |
| 448       | Flutamide                 | 0.99 | 0.95 | 0.95 | 1.77 | 1.67 | 1.03    | 0.09 |
| 449       | Fluconazole               | 1.13 | 0.98 | 0.99 | 1.32 | 1.02 | 1.16    | 0.09 |
| 450       | Formestane                | 0.93 | 1.08 | 0.96 | 1.89 | 1.06 | 1.19    | 0.09 |
| 451       | Ftorafur                  | 1.19 | 1.18 | 1.13 | 1.21 | 0.91 | 1.26    | 0.13 |
| 452       | Furosemide                | 0.94 | 1.01 | 1.00 | 1.31 | 0.94 | 0.95    | 0.08 |
| 453       | Ganciclovir               | 0.93 | 0.98 | 0.88 | 1.42 | 1.00 | 1.27    | 0.11 |
| 454       | Gatifloxacin              | 1.24 | 0.90 | 1.12 | 1.42 | 1.21 | 1.30    | 0.10 |
| 455       | Gentamycin                | 0.97 | 0.92 | 0.76 | 1.38 | 1.05 | 0.95    | 0.08 |
| 456       | Gemfibrozil               | 1.41 | 0.89 | 1.26 | 1.44 | 1.12 | 1.25    | 0.11 |
| 457       | Gliclazide                | 1.26 | 0.99 | 1.11 | 1.52 | 1.10 | 1.22    | 0.10 |
| 458       | Glimepiride               | 1.14 | 0.97 | 1.23 | 1.82 | 1.20 | 1.38    | 0.12 |
| 459       | Guaifenesin               | 1.17 | 0.93 | 0.85 | 1.44 | 1.07 | 1.22    | 0.10 |
| 460       | Hexestrol                 | 1.08 | 0.92 | 0.78 | 1.19 | 1.09 | 0.47    | 0.08 |
| 461       | Hydrocortisone            | 0.91 | 0.82 | 1.44 | 1.54 | 0.98 | 1.15    | 0.12 |
| 462       | Hydrocortisone 21-acetate | 0.95 | 1.03 | 1.09 | 1.58 | 1.07 | 0.82    | 0.06 |
| 463       | 17- Hydroxyprogesterone   | 0.99 | 0.89 | 0.39 | 2.32 | 1.46 | 1.39    | 0.11 |
| 464       | Idoxuridine               | 0.96 | 1.21 | 0.97 | 1.98 | 0.98 | 1.25    | 0.09 |
| 465       | Ifosfamide                | 1.01 | 0.98 | 1.14 | 1.42 | 0.96 | 1.19    | 0.12 |
| 466       | Imiquimod                 | 0.96 | 0.94 | 1.15 | 1.53 | 1.30 | 1.10    | 0.12 |
| 467       | Indapamide                | 1.04 | 0.95 | 1.06 | 1.35 | 1.11 | 1.30    | 0.12 |
| 468       | Itopride                  | 1.04 | 1.09 | 1.18 | 1.35 | 0.94 | 1.22    | 0.11 |
| 469       | Itraconazole              | 1.16 | 1.22 | 1.15 | 2.31 | 1.15 | 0.80    | 0.15 |
| 470       | (S)-(+)-Ketoprofen        | 1.05 | 1.02 | 0.99 | 1.47 | 1.11 | 1.30    | 0.10 |
| 471       | Levamisole                | 0.97 | 1.03 | 1.20 | 1.43 | 0.90 | 0.87    | 0.07 |

| Comp. No.                | Name                           | MTT  |      |      |      |      | Imaging |      |
|--------------------------|--------------------------------|------|------|------|------|------|---------|------|
|                          |                                | 4    | 24   | 48   | 72   | 120  | 120     |      |
| Method:<br>Time (hours): |                                |      |      |      |      |      | StDev   |      |
| 472                      | Levonorgestrel                 | 1.06 | 0.94 | 1.06 | 1.79 | 1.29 | 1.00    | 0.07 |
| 473                      | Levodopa                       | 1.14 | 0.89 | 1.00 | 1.14 | 0.92 | 0.98    | 0.09 |
| 474                      | Levofloxacin                   | 1.11 | 0.92 | 1.07 | 1.79 | 1.02 | 0.94    | 0.09 |
| 475                      | Leflunomide                    | 0.99 | 1.28 | 1.20 | 1.50 | 1.13 | 1.29    | 0.10 |
| 476                      | Lisinopril                     | 1.04 | 1.06 | 1.24 | 1.42 | 1.00 | 0.95    | 0.10 |
| 477                      | Lomefloxacin                   | 1.13 | 1.04 | 0.97 | 1.19 | 1.17 | 0.96    | 0.15 |
| 478                      | Loratadine                     | 1.18 | 0.86 | 0.84 | 1.54 | 1.22 | 0.56    | 0.05 |
| 479                      | Lorglumide                     | 1.23 | 0.96 | 1.29 | 1.44 | 1.15 | 1.11    | 0.18 |
| 480                      | Losartan potassium             | 1.13 | 0.94 | 1.14 | 1.42 | 1.14 | 1.04    | 0.18 |
| 481                      | Mebendazol                     | 0.62 | 0.33 | 0.37 | 0.83 | 0.73 | 0.61    | 0.10 |
| 482                      | Medroxyprogesterone 17-Acetate | 0.85 | 0.90 | 1.38 | 1.03 | 1.04 | 1.15    | 0.14 |
| 483                      | Mefenamic acid                 | 0.88 | 0.91 | 1.34 | 1.32 | 0.98 | 1.31    | 0.10 |
| 484                      | Melphalan                      | 0.95 | 0.78 | 0.73 | 0.50 | 0.43 | 1.00    | 0.08 |
| 485                      | Methyldopa                     | 0.97 | 0.87 | 1.22 | 0.73 | 0.93 | 1.15    | 0.11 |
| 486                      | Methylprednisolone             | 0.90 | 1.06 | 1.19 | 0.95 | 0.95 | 0.88    | 0.06 |
| 487                      | Metoprolol                     | 0.87 | 0.86 | 1.36 | 1.28 | 0.90 | 1.05    | 0.09 |
| 488                      | Methimazole                    | 0.89 | 0.84 | 1.08 | 1.38 | 0.90 | 1.09    | 0.10 |
| 489                      | Metronidazole                  | 0.88 | 1.02 | 1.09 | 1.31 | 0.89 | 1.08    | 0.10 |
| 490                      | Miconazole                     | 0.98 | 0.68 | 2.16 | 1.46 | 0.99 | 0.54    | 0.15 |
| 491                      | Minocycline                    | 1.07 | 0.80 | 1.18 | 1.07 | 0.13 | 0.38    | 0.06 |
| 492                      | Mitoxantrone                   | 0.71 | 0.18 | 0.15 | 0.03 | 0.15 | 0.38    | 0.16 |
| 493                      | Taxol                          | 0.96 | 0.51 | 0.37 | 0.74 | 0.74 | 0.46    | 0.14 |
| 494                      | Myclobutanil                   | 0.86 | 0.74 | 1.01 | 1.02 | 1.03 | 1.24    | 0.09 |
| 495                      | Nadifloxacin                   | 1.00 | 0.95 | 1.13 | 1.18 | 1.10 | 1.23    | 0.14 |
| 496                      | Nabumetone                     | 0.88 | 0.80 | 0.96 | 1.46 | 0.96 | 1.32    | 0.11 |
| 497                      | Naphazoline                    | 0.89 | 0.73 | 1.03 | 1.33 | 1.01 | 1.31    | 0.10 |
| 498                      | Nefazodone                     | 0.74 | 0.64 | 0.60 | 0.12 | 1.40 | 0.42    | 0.09 |
| 499                      | Niflumic acid                  | 1.08 | 0.82 | 0.92 | 1.46 | 1.03 | 1.29    | 0.10 |
| 500                      | Norethindrone                  | 1.00 | 0.87 | 0.96 | 1.80 | 1.13 | 1.38    | 0.11 |
| 501                      | Norfloxacin                    | 1.05 | 0.77 | 1.25 | 1.23 | 0.97 | 1.16    | 0.13 |
| 502                      | Nystatin                       | 0.72 | 0.70 | 0.92 | 1.15 | 0.79 | 1.00    | 0.07 |
| 503                      | Ofloxacin                      | 0.90 | 0.90 | 0.89 | 1.15 | 0.97 | 0.92    | 0.26 |
| 504                      | Oltipraz                       | 1.15 | 0.78 | 0.80 | 1.16 | 0.81 | 1.05    | 0.09 |
| 505                      | Omeprazole                     | 0.89 | 0.80 | 0.98 | 1.04 | 1.04 | 1.32    | 0.12 |
| 506                      | Oxcarbazepine                  | 0.91 | 0.83 | 1.07 | 1.14 | 1.07 | 1.23    | 0.09 |
| 507                      | Oxiconazole                    | 0.99 | 0.59 | 0.60 | 0.35 | 1.04 | 0.46    | 0.04 |
| 508                      | Oxacillin                      | 0.87 | 0.79 | 1.02 | 1.32 | 1.09 | 1.21    | 0.10 |
| 509                      | Oxfendazole                    | 0.97 | 0.75 | 0.49 | 0.66 | 0.74 | 1.10    | 0.12 |
| 510                      | Oxibendazole                   | 0.88 | 0.41 | 0.36 | 0.56 | 0.62 | 0.79    | 0.06 |
| 511                      | Pantoprazole                   | 0.96 | 1.26 | 0.91 | 1.63 | 1.03 | 1.38    | 0.10 |
| 512                      | Paroxetine                     | 0.74 | 0.68 | 0.50 | 0.02 | 0.88 | 0.21    | 0.02 |
| 513                      | Pazufloxacin                   | 0.91 | 1.01 | 1.00 | 1.08 | 0.94 | 1.20    | 0.09 |
| 514                      | Pefloxacin mesylate dihydrate  | 0.87 | 0.98 | 1.17 | 1.07 | 1.08 | 1.33    | 0.10 |

| Comp. No. | Name                   | MTT  |      |      |      |      | Imaging |      |
|-----------|------------------------|------|------|------|------|------|---------|------|
|           |                        | 4    | 24   | 48   | 72   | 120  | 120     |      |
|           |                        |      |      |      |      |      | StDev   |      |
| 515       | Penciclovir            | 0.95 | 1.25 | 1.07 | 1.07 | 0.98 | 1.22    | 0.10 |
| 516       | Pentoxifylline         | 1.04 | 1.05 | 0.95 | 1.08 | 1.00 | 1.11    | 0.08 |
| 517       | Pencillin V            | 1.00 | 1.13 | 0.88 | 1.24 | 1.05 | 1.16    | 0.09 |
| 518       | Phenylbutazone         | 1.03 | 1.07 | 0.85 | 1.34 | 1.00 | 1.28    | 0.10 |
| 519       | Piperacillin           | 0.94 | 0.88 | 0.90 | 1.24 | 1.04 | 1.15    | 0.12 |
| 520       | Pravastatin Lactone    | 1.07 | 0.91 | 0.96 | 1.25 | 1.04 | 1.25    | 0.09 |
| 521       | Pranoprofen            | 1.06 | 1.02 | 1.16 | 1.36 | 0.98 | 1.30    | 0.09 |
| 522       | Prednisolone           | 0.87 | 1.01 | 1.31 | 1.29 | 0.90 | 0.87    | 0.06 |
| 523       | Progesterone           | 0.93 | 1.02 | 0.95 | 1.05 | 1.08 | 1.05    | 0.19 |
| 524       | Procarbazine           | 0.94 | 0.92 | 1.07 | 1.00 | 0.84 | 1.15    | 0.09 |
| 525       | Prothionamide          | 0.85 | 0.96 | 1.19 | 1.11 | 0.85 | 1.17    | 0.09 |
| 526       | Prednisone             | 0.89 | 1.01 | 1.03 | 1.27 | 1.03 | 1.04    | 0.08 |
| 527       | Pregnenolone           | 0.81 | 0.90 | 1.11 | 1.90 | 1.18 | 1.09    | 0.08 |
| 528       | Primaquine             | 0.76 | 0.85 | 1.31 | 1.30 | 0.97 | 0.66    | 0.05 |
| 529       | Praziquantel           | 0.88 | 0.91 | 1.16 | 1.49 | 1.12 | 1.35    | 0.10 |
| 530       | Pyrantel Pamoate       | 0.85 | 1.12 | 1.12 | 1.19 | 0.91 | 1.27    | 0.10 |
| 531       | Quinacrine             | 0.60 | 0.13 | 0.13 | 0.02 | 0.12 | 0.20    | 0.14 |
| 532       | Quinapril              | 1.05 | 0.93 | 0.93 | 1.09 | 0.92 | 1.13    | 0.10 |
| 533       | Racecadotril           | 1.17 | 0.95 | 1.04 | 1.22 | 0.92 | 1.25    | 0.09 |
| 534       | Ranolazine·2HCl        | 0.87 | 1.01 | 0.96 | 1.20 | 0.99 | 1.19    | 0.09 |
| 535       | Ramipril               | 0.91 | 0.94 | 1.07 | 1.12 | 0.98 | 1.04    | 0.11 |
| 536       | Rebamipide             | 0.91 | 1.07 | 1.06 | 1.15 | 0.95 | 1.10    | 0.09 |
| 537       | Ribavirin              | 0.90 | 1.04 | 0.98 | 1.07 | 0.97 | 1.17    | 0.09 |
| 538       | Nelfinavir mesylate    | 0.96 | 0.57 | 0.56 | 0.03 | 0.39 | 0.41    | 0.12 |
| 539       | Rimantadine            | 0.81 | 0.90 | 0.86 | 1.03 | 0.93 | 1.21    | 0.12 |
| 540       | Propranolol            | 0.87 | 0.93 | 0.84 | 0.92 | 0.91 | 1.08    | 0.12 |
| 541       | Roxatidine acetate·HCl | 0.94 | 0.98 | 0.95 | 1.16 | 0.87 | 1.24    | 0.09 |
| 542       | Roxithromycin          | 0.80 | 1.02 | 0.88 | 0.83 | 0.96 | 0.95    | 0.21 |
| 543       | Rufloxacin             | 0.89 | 0.94 | 1.10 | 1.00 | 0.96 | 1.32    | 0.09 |
| 544       | Sarafloxacin           | 1.01 | 0.94 | 1.13 | 0.95 | 0.91 | 1.22    | 0.09 |
| 545       | Scopolamine N-butyl    | 0.91 | 1.00 | 1.01 | 1.04 | 0.87 | 1.27    | 0.13 |
| 546       | Scopolamine            | 0.90 | 1.14 | 1.17 | 1.09 | 1.08 | 1.09    | 0.16 |
| 547       | Secnidazole            | 0.84 | 0.96 | 0.94 | 1.10 | 0.96 | 1.18    | 0.08 |
| 548       | Sibutramine            | 0.80 | 0.98 | 1.02 | 1.07 | 1.05 | 0.97    | 0.17 |
| 549       | Sparfloxacin           | 0.82 | 1.02 | 1.00 | 1.06 | 1.08 | 0.96    | 0.22 |
| 550       | Spirolactone           | 0.84 | 1.00 | 1.14 | 1.63 | 1.27 | 1.38    | 0.10 |
| 551       | Stanozolol             | 1.17 | 1.19 | 1.00 | 1.68 | 0.66 | 0.87    | 0.07 |
| 552       | Streptomycin           | 0.90 | 0.94 | 0.88 | 1.10 | 0.94 | 0.93    | 0.08 |
| 553       | Sulfadoxine            | 1.13 | 1.02 | 1.07 | 1.11 | 0.92 | 1.00    | 0.07 |
| 554       | Sulfadiazine           | 1.59 | 0.99 | 1.11 | 1.11 | 0.97 | 1.06    | 0.08 |
| 555       | Sulfadimethoxine       | 1.14 | 1.09 | 1.05 | 1.09 | 0.99 | 0.91    | 0.07 |
| 556       | Sulfasalazine          | 1.30 | 1.17 | 1.10 | 0.99 | 1.05 | 0.99    | 0.08 |
| 557       | Tamsulosin             | 0.99 | 0.91 | 1.06 | 1.04 | 1.04 | 1.03    | 0.12 |

| Comp. No. | Name                   | MTT  |      |      |      |      | Imaging |      |
|-----------|------------------------|------|------|------|------|------|---------|------|
|           |                        | 4    | 24   | 48   | 72   | 120  | 120     |      |
| Method:   | Time (hours):          |      |      |      |      |      | StDev   |      |
| 558       | Telmisartan            | 1.11 | 0.96 | 1.14 | 1.39 | 1.18 | 1.23    | 0.09 |
| 559       | Tenoxicam              | 1.02 | 0.98 | 1.07 | 1.19 | 1.15 | 1.27    | 0.12 |
| 560       | Terazosin              | 1.00 | 1.00 | 1.07 | 1.08 | 1.02 | 1.23    | 0.09 |
| 561       | Tetracycline           | 0.58 | 0.84 | 0.81 | 1.09 | 1.15 | 1.00    | 0.18 |
| 562       | Tenatoprazole          | 0.57 | 1.15 | 2.31 | 1.25 | 0.99 | 1.46    | 0.24 |
| 563       | Temozolomide           | 0.52 | 1.07 | 0.72 | 1.46 | 0.96 | 1.24    | 0.22 |
| 564       | Tibolone               | 0.58 | 0.95 | 0.88 | 1.71 | 1.32 | 1.62    | 0.27 |
| 565       | Tioconazole            | 0.47 | 0.72 | 0.52 | 0.04 | 1.06 | 0.25    | 0.07 |
| 566       | Tinidazole             | 0.53 | 0.89 | 0.93 | 1.04 | 1.08 | 1.05    | 0.18 |
| 567       | Tobramycin (free base) | 0.56 | 0.90 | 0.83 | 1.18 | 0.94 | 1.28    | 0.32 |
| 568       | Tosufloxacin           | 0.51 | 0.87 | 0.55 | 0.77 | 0.85 | 1.18    | 0.24 |
| 569       | Topotecan-HCl          | 0.70 | 0.60 | 0.40 | 0.69 | 0.49 | 1.24    | 0.26 |
| 570       | Toremifene             | 0.74 | 0.86 | 0.75 | 1.47 | 0.88 | 0.94    | 0.17 |
| 571       | Tolfenamic acid        | 0.79 | 0.98 | 0.92 | 1.43 | 0.97 | 1.40    | 0.23 |
| 572       | Tolmetin               | 0.59 | 0.92 | 0.82 | 0.87 | 0.96 | 1.21    | 0.40 |
| 573       | Amoxicillin            | 0.86 | 1.03 | 1.18 | 1.43 | 0.97 | 1.45    | 0.24 |
| 574       | Tramadol               | 0.71 | 1.11 | 1.00 | 1.44 | 0.96 | 1.29    | 0.21 |
| 575       | Triamcinolone          | 0.76 | 0.95 | 1.02 | 1.44 | 0.96 | 1.18    | 0.20 |
| 576       | Trimethoprim           | 0.53 | 0.93 | 1.04 | 1.12 | 0.89 | 1.29    | 0.25 |
| 577       | Tropisetron            | 0.68 | 0.90 | 0.74 | 1.31 | 0.88 | 1.18    | 0.21 |
| 578       | Tylosin                | 0.56 | 1.02 | 0.77 | 1.16 | 1.01 | 1.21    | 0.23 |
| 579       | Valaciclovir           | 0.59 | 0.88 | 0.73 | 1.46 | 1.07 | 0.99    | 0.17 |
| 580       | Vecuronium             | 1.01 | 0.92 | 0.75 | 1.47 | 1.04 | 1.30    | 0.22 |
| 581       | Venlafaxine            | 0.64 | 0.87 | 0.73 | 1.09 | 0.97 | 1.58    | 0.27 |
| 582       | Vidarabine             | 0.54 | 1.27 | 0.78 | 1.22 | 1.02 | 1.31    | 0.23 |
| 583       | Iproniazid             | 0.62 | 1.00 | 0.69 | 1.43 | 1.00 | 1.56    | 0.27 |
| 584       | Benzamil               | 0.76 | 0.95 | 0.63 | 1.07 | 0.85 | 1.14    | 0.19 |
| 585       | Bupivacaine            | 0.72 | 1.10 | 0.89 | 1.25 | 0.91 | 1.29    | 0.22 |
| 586       | Astemizole             | 0.55 | 0.23 | 0.21 | 0.01 | 0.14 | NA      | NA   |
| 587       | Ketotifen              | 0.58 | 0.78 | 0.69 | 1.17 | 1.04 | 1.15    | 0.19 |
| 588       | Levocabastine-HCl      | 0.83 | 0.85 | 0.71 | 1.33 | 1.15 | 1.37    | 0.23 |
| 589       | Naloxone               | 0.49 | 0.84 | 0.64 | 1.34 | 1.04 | 1.40    | 0.24 |
| 590       | Naloxonazine           | 0.38 | 0.43 | 0.60 | 0.02 | 0.48 | 0.42    | 0.10 |
| 591       | Harmine                | 0.42 | 0.78 | 0.61 | 0.86 | 0.66 | 0.75    | 0.21 |
| 592       | Cinanserin             | 0.46 | 0.70 | 0.82 | 1.30 | 0.93 | 1.29    | 0.22 |
| 593       | Dibenzepine            | 0.50 | 0.93 | 0.93 | 1.38 | 0.99 | 1.62    | 0.27 |
| 594       | Dihydroergocristine    | 1.50 | 1.44 | 1.16 | 1.43 | 1.21 | 0.49    | 0.10 |
| 595       | Fluperlapine           | 0.56 | 0.73 | 0.84 | 1.23 | 1.08 | 1.15    | 0.43 |
| 596       | Fluoxetine             | 0.36 | 0.73 | 0.69 | 1.23 | 1.06 | 0.98    | 0.20 |
| 597       | Ondansetron            | 0.41 | 1.53 | 0.86 | 1.48 | 0.91 | 1.31    | 0.24 |
| 598       | Ketanserin             | 0.58 | 0.86 | 0.81 | 1.58 | 1.05 | 1.56    | 0.26 |
| 599       | Tiotropium Bromide     | 0.46 | 0.89 | 0.78 | 1.26 | 1.02 | 1.55    | 0.26 |
| 600       | Mesoridazine besylate  | 0.47 | 0.88 | 0.78 | 1.35 | 0.95 | 1.34    | 0.24 |

| Comp. No. | Name                 | MTT  |      |      |      |      | Imaging |      |
|-----------|----------------------|------|------|------|------|------|---------|------|
|           |                      | 4    | 24   | 48   | 72   | 120  | 120     |      |
| Method:   | Time (hours):        |      |      |      |      |      | StDev   |      |
| 601       | Thioridazine         | 0.59 | 0.30 | 0.44 | 1.59 | 0.13 | NA      | NA   |
| 602       | Cilostamide          | 0.96 | 0.92 | 1.14 | 1.58 | 1.04 | 1.34    | 0.24 |
| 603       | Etazolate            | 0.92 | 0.91 | 1.16 | 1.17 | 0.88 | 1.72    | 0.29 |
| 604       | amrinone             | 0.87 | 0.94 | 0.72 | 0.94 | 0.92 | 1.12    | 0.20 |
| 605       | Irsogladine          | 0.89 | 0.87 | 1.09 | 1.12 | 0.90 | 1.39    | 0.23 |
| 606       | Milrinone            | 1.03 | 0.95 | 1.15 | 1.08 | 0.95 | 1.13    | 0.20 |
| 607       | Rolipram             | 0.90 | 0.92 | 1.07 | 1.34 | 0.86 | 1.36    | 0.23 |
| 608       | Siguazodan           | 0.91 | 1.14 | 1.06 | 1.23 | 0.87 | 1.32    | 0.22 |
| 609       | Trequinsin-HCl       | 0.95 | 0.92 | 0.96 | 0.92 | 0.92 | 0.77    | 0.13 |
| 610       | Vinpocetine          | 0.99 | 1.00 | 0.98 | 1.54 | 0.99 | 1.36    | 0.23 |
| 611       | Zaprinast            | 1.20 | 1.06 | 0.82 | 1.29 | 0.97 | 1.45    | 0.24 |
| 612       | Zardaverine          | 0.91 | 1.01 | 0.79 | 1.14 | 0.87 | 1.44    | 0.29 |
| 613       | Alprostadi           | 0.85 | 0.81 | 0.66 | 0.80 | 0.91 | 1.08    | 0.20 |
| 614       | Misoprostol          | 0.88 | 0.85 | 0.62 | 0.61 | 0.90 | 1.07    | 0.22 |
| 615       | Argatroban           | 1.11 | 0.97 | 0.93 | 1.05 | 1.00 | 1.25    | 0.22 |
| 616       | Cilastatin           | 0.86 | 0.97 | 0.94 | 1.14 | 0.98 | 1.39    | 0.26 |
| 617       | Artesunate           | 0.92 | 0.66 | 0.69 | 0.90 | 0.45 | 1.05    | 0.20 |
| 618       | Picotamide           | 0.80 | 1.22 | 1.05 | 1.33 | 0.97 | 1.45    | 0.25 |
| 619       | Butoconazole nitrate | 0.98 | 0.89 | 0.59 | 0.61 | 1.15 | 0.71    | 0.14 |
| 620       | Mifepristone         | 1.03 | 1.36 | 1.28 | 1.27 | 1.42 | 1.12    | 0.19 |
| 621       | Megestrol Acetate    | 1.33 | 0.97 | 1.07 | 1.63 | 1.34 | 1.54    | 0.26 |
| 622       | Melengestrol Acetate | 0.98 | 1.15 | 2.52 | 1.14 | 1.88 | 1.31    | 0.24 |
| 623       | Tamoxifen            | 0.79 | 0.84 | 0.83 | 0.03 | 0.95 | NA      | NA   |
| 624       | Amprenavir           | 0.83 | 1.00 | 1.18 | 1.74 | 1.11 | 1.33    | 0.25 |
| 625       | Aprepitant           | 0.82 | 0.63 | 0.56 | 0.17 | 0.15 | 0.75    | 0.13 |
| 626       | Bosentan             | 0.94 | 0.91 | 1.13 | 1.34 | 1.24 | 1.34    | 0.26 |
| 627       | Efavirenz            | 0.98 | 0.58 | 0.62 | 1.50 | 0.95 | 0.52    | 0.09 |
| 628       | Taurocholic acid     | 1.18 | 0.97 | 1.14 | 1.33 | 1.04 | 1.35    | 0.25 |
| 629       | Miglustat            | 0.97 | 0.86 | 0.97 | 1.29 | 1.04 | 1.18    | 0.20 |
| 630       | Fulvestrant          | 1.06 | 1.34 | 1.52 | 2.22 | 1.20 | 1.38    | 0.24 |
| 631       | Methysergide maleate | 1.21 | 1.13 | 1.15 | 0.93 | 1.08 | 1.21    | 0.25 |
| 632       | Esmolol              | 0.97 | 1.13 | 1.43 | 1.21 | 0.97 | 1.01    | 0.17 |
| 633       | Pantothenic acid     | 1.10 | 0.99 | 0.89 | 1.38 | 0.91 | 1.20    | 0.20 |
| 634       | Capecitabine         | 0.97 | 1.23 | 1.31 | 1.19 | 0.91 | 1.17    | 0.20 |
| 635       | Phenylpropanolamine  | 1.08 | 1.19 | 0.98 | 1.05 | 0.85 | 1.08    | 0.20 |
| 636       | Succinylcholine      | 1.10 | 1.04 | 1.00 | 1.20 | 0.94 | 1.03    | 0.18 |
| 637       | Trifluperidol        | 0.92 | 1.00 | 0.86 | 0.88 | 1.02 | 1.07    | 0.19 |
| 638       | L-thyroxine          | 1.08 | 1.08 | 1.37 | 1.50 | 0.99 | 1.06    | 0.18 |
| 639       | Cyproheptadine       | 0.85 | 0.83 | 0.75 | 1.17 | 1.19 | 1.03    | 0.17 |
| 640       | Benzydamine          | 0.84 | 0.84 | 0.79 | 1.01 | 0.98 | 0.93    | 0.16 |

NA: Quantification not available because of the detection of a false positive signal due to empty wells.
