# Supplementary material for: Host-Directed Antimicrobial Drugs with Broad-Spectrum Efficacy against Intracellular Bacterial Pathogens
Source: PubMed Central journal article supplement — mBio. 2014 Jul 29;5(4):e01534-14. doi: 10.1128/mBio.01534-14 (PMC4128363; doi:10.1128/mbio.01534-14), 2014-07-29
Supplement: mbo004141922st2.pdf [file mbo004141922st2.pdf]

**C. burnetii inhibition, >80% (112)****Host-targeting (75)**

| Comp. No. | Name | Therapeutic Class                  | Growth               | StDev |      |
|-----------|------|------------------------------------|----------------------|-------|------|
| 1         | 5    | Donepezil·HCl                      | Nootropic            | 0.10  | 0.11 |
| 2         | 12   | Bepridil·HCl                       | Antianginal          | 0.00  | 0.08 |
| 3         | 13   | Amiodarone·HCl                     | Antiarrhythmic       | -0.04 | 0.08 |
| 4         | 14   | Nicardipine·HCl                    | Antihypertensive     | 0.01  | 0.12 |
| 5         | 16   | Loperamide·HCl                     | Antidarrheal         | -0.01 | 0.09 |
| 6         | 24   | Propafenone                        | Antiarrhythmic       | 0.06  | 0.10 |
| 7         | 33   | Naftopidil·2HCl                    | Antihypertensive     | 0.05  | 0.12 |
| 8         | 40   | Dihydroergotamine mesylate         | Antimigraine         | 0.04  | 0.07 |
| 9         | 55   | Maprotiline·HCl                    | Antidepressant       | 0.02  | 0.11 |
| 10        | 56   | Nisoxetine·HCl                     | Antidepressant       | 0.17  | 0.15 |
| 11        | 67   | Haloperidol                        | Antipsychotic        | 0.00  | 0.11 |
| 12        | 81   | Mianserin·HCl                      | Antidepressant       | 0.19  | 0.09 |
| 13        | 93   | (+)-Butaclamol·HCl                 | Antipsychotic        | 0.00  | 0.07 |
| 14        | 95   | Chlorpromazine·HCl                 | Antiemetic           | -0.02 | 0.11 |
| 15        | 96   | Domperidone                        | Antiemetic           | 0.00  | 0.10 |
| 16        | 103  | Promethazine·HCl                   | Antihistamine        | 0.02  | 0.12 |
| 17        | 105  | Naltrindole·HCl                    | Opioid antagonist    | 0.02  | 0.11 |
| 18        | 107  | Spiperone·HCl                      | Antipsychotic        | 0.08  | 0.12 |
| 19        | 111  | Quetiapine Fumarate                | Antipsychotic        | 0.00  | 0.05 |
| 20        | 113  | Imipramine·HCl                     | Antidepressant       | 0.05  | 0.11 |
| 21        | 114  | Amoxapine                          | Antidepressant       | 0.03  | 0.11 |
| 22        | 118  | Naltriben methanesulfonate hydrate | Opioid antagonist    | 0.02  | 0.11 |
| 23        | 130  | Clemastine                         | Antihistamine        | -0.01 | 0.09 |
| 24        | 131  | Vardenafil                         | Erectile dysfunction | 0.07  | 0.10 |
| 25        | 135  | Manidipine                         | Antihypertensive     | -0.01 | 0.09 |
| 26        | 139  | Nisoldipine                        | Antihypertensive     | 0.04  | 0.15 |
| 27        | 140  | Lacidipine                         | Antihypertensive     | 0.15  | 0.07 |
| 28        | 149  | Aripiprazole                       | Antipsychotic        | -0.02 | 0.03 |
| 29        | 153  | Escitalopram                       | Antidepressant       | 0.20  | 0.07 |
| 30        | 163  | Propranolol S(-)                   | Antihypertensive     | 0.17  | 0.08 |
| 31        | 194  | Diltiazem                          | Antihypertensive     | 0.18  | 0.15 |
| 32        | 196  | Nimodipine                         | Antihypertensive     | 0.16  | 0.07 |
| 33        | 197  | Nitrendipine                       | Antihypertensive     | 0.19  | 0.16 |
| 34        | 198  | Verapamil                          | Antihypertensive     | 0.07  | 0.09 |
| 35        | 200  | Flunarizine·2HCl                   | Vasodilator          | -0.03 | 0.03 |
| 36        | 202  | Felodipine                         | Antihypertensive     | 0.03  | 0.05 |
| 37        | 203  | Cilnidipine                        | Antihypertensive     | 0.05  | 0.11 |
| 38        | 215  | Bromocriptine mesylate             | Antiparkinsonian     | 0.06  | 0.05 |
| 39        | 216  | Clozapine                          | Antipsychotic        | 0.00  | 0.10 |
| 40        | 217  | Clothiapine                        | Antipsychotic        | 0.02  | 0.08 |
| 41        | 223  | Oxatomide                          | Antiallergic         | 0.00  | 0.09 |
| 42        | 227  | Dipyridamole                       | Antithrombotic       | 0.06  | 0.06 |
| 43        | 256  | Suramin                            | Anthelmintic         | 0.17  | 0.19 |

|    |     |                       |                              |       |      |
|----|-----|-----------------------|------------------------------|-------|------|
| 44 | 274 | Lapatinib ditosylate  | Antineoplastic               | 0.04  | 0.12 |
| 45 | 283 | Calcipotriene         | Antipsoriatic                | 0.17  | 0.09 |
| 46 | 305 | Bicalutamide          | Antineoplastic               | 0.15  | 0.14 |
| 47 | 330 | Lomerizine            | Antimigraine                 | 0.01  | 0.11 |
| 48 | 380 | Canrenone             | Diuretic                     | 0.01  | 0.09 |
| 49 | 388 | Chlormadinone Acetate | Progestogen                  | 0.16  | 0.20 |
| 50 | 394 | Citalopram            | Antidepressant               | 0.03  | 0.08 |
| 51 | 402 | Orphenadrine citrate  | Antispasmodic                | 0.08  | 0.09 |
| 52 | 410 | Danazol               | Antigonadotropin             | 0.03  | 0.09 |
| 53 | 412 | Desloratadine         | Antihistamine                | 0.00  | 0.12 |
| 54 | 419 | Doxazosin             | Antihypertensive             | 0.04  | 0.09 |
| 55 | 428 | Estradiol             | Estrogen                     | 0.19  | 0.04 |
| 56 | 440 | Finasteride           | Benign prostatic hypertrophy | 0.14  | 0.02 |
| 57 | 444 | Amitriptyline·HCl     | Antidepressant               | -0.02 | 0.09 |
| 58 | 448 | Flutamide             | Antiandrogen                 | 0.18  | 0.14 |
| 59 | 478 | Loratadine            | Antihistamine                | 0.02  | 0.06 |
| 60 | 523 | Progesterone          | Progestogen                  | 0.01  | 0.03 |
| 61 | 540 | Propranolol           | Antihypertensive             | 0.13  | 0.04 |
| 62 | 570 | Toremifene            | Antineoplastic               | 0.20  | 0.29 |
| 63 | 577 | Tropisetron           | Antiemetic                   | 0.16  | 0.09 |
| 64 | 587 | Ketotifen             | Antiasthmatic                | 0.15  | 0.11 |
| 65 | 592 | Cinanserin            | Serotonin antagonist         | 0.17  | 0.07 |
| 66 | 594 | Dihydroergocristine   | Antivertigo                  | 0.01  | 0.13 |
| 67 | 596 | Fluoxetine            | Antidepressant               | 0.01  | 0.12 |
| 68 | 600 | Mesoridazine besylate | Antipsychotic                | 0.03  | 0.13 |
| 69 | 602 | Cilostamide           | Antithrombotic               | 0.06  | 0.09 |
| 70 | 609 | Trequinsin·HCl        | Antihypertensive             | 0.05  | 0.06 |
| 71 | 620 | Mifepristone          | Abortifacient                | 0.20  | 0.04 |
| 72 | 622 | Melengestrol Acetate  | Progestogen                  | 0.20  | 0.08 |
| 73 | 637 | Trifluoperidol        | Antipsychotic                | 0.02  | 0.09 |
| 74 | 639 | Cyproheptadine        | Antihistamine                | 0.00  | 0.12 |
| 75 | 640 | Benzydamine           | Analgesic                    | 0.00  | 0.04 |

**Pathogen-targeting (37)**

|    | Comp. No. | Name             | Therapeutic Class | Growth | StDev |
|----|-----------|------------------|-------------------|--------|-------|
| 1  | 132       | Linezolid        | Antibiotic        | 0.02   | 0.13  |
| 2  | 146       | Atovaquone       | Antipneumocystic  | 0.09   | 0.16  |
| 3  | 147       | Sertaconazole    | Antifungal        | -0.01  | 0.09  |
| 4  | 243       | Moxifloxacin·HCl | Antibiotic        | 0.05   | 0.13  |
| 5  | 265       | Rifampicin       | Antibiotic        | 0.05   | 0.11  |
| 6  | 286       | Pentamidine      | Antiprotozoal     | 0.07   | 0.14  |
| 7  | 320       | Atazanavir       | Antiviral         | 0.18   | 0.14  |
| 8  | 339       | Rifamycin SV     | Antibiotic        | 0.02   | 0.09  |
| 9  | 373       | Azithromycin     | Antibiotic        | 0.02   | 0.10  |
| 10 | 376       | Bifonazole       | Antifungal        | -0.03  | 0.08  |
| 11 | 393       | Ciprofloxacin    | Antibiotic        | 0.04   | 0.09  |
| 12 | 395       | Clarithromycin   | Antibiotic        | 0.02   | 0.11  |

|    |     |                               |            |       |      |
|----|-----|-------------------------------|------------|-------|------|
| 13 | 397 | Clinafloxacin                 | Antibiotic | -0.01 | 0.12 |
| 14 | 422 | Doxycycline                   | Antibiotic | -0.01 | 0.12 |
| 15 | 424 | Enoxacin                      | Antibiotic | 0.09  | 0.10 |
| 16 | 425 | Enrofloxacin                  | Antibiotic | 0.02  | 0.11 |
| 17 | 443 | Fleroxacin                    | Antibiotic | 0.02  | 0.13 |
| 18 | 454 | Gatifloxacin                  | Antibiotic | 0.00  | 0.11 |
| 19 | 469 | Itraconazole                  | Antifungal | 0.10  | 0.11 |
| 20 | 474 | Levofloxacin                  | Antibiotic | 0.02  | 0.10 |
| 21 | 477 | Lomefloxacin                  | Antibiotic | 0.02  | 0.11 |
| 22 | 490 | Miconazole                    | Antifungal | 0.02  | 0.10 |
| 23 | 495 | Nadifloxacin                  | Antibiotic | 0.04  | 0.10 |
| 24 | 501 | Norfloxacin                   | Antibiotic | 0.07  | 0.12 |
| 25 | 503 | Ofloxacin                     | Antibiotic | 0.03  | 0.10 |
| 26 | 513 | Pazufloxacin                  | Antibiotic | 0.04  | 0.10 |
| 27 | 514 | Pefloxacin mesylate dihydrate | Antibiotic | 0.03  | 0.12 |
| 28 | 542 | Roxithromycin                 | Antibiotic | 0.02  | 0.09 |
| 29 | 543 | Rufloxacin                    | Antibiotic | 0.06  | 0.09 |
| 30 | 544 | Sarafloxacin                  | Antibiotic | 0.05  | 0.10 |
| 31 | 549 | Sparfloxacin                  | Antibiotic | 0.02  | 0.09 |
| 32 | 561 | Tetracycline                  | Antibiotic | 0.03  | 0.14 |
| 33 | 567 | Tobramycin (free base)        | Antibiotic | 0.10  | 0.15 |
| 34 | 568 | Tosufloxacin                  | Antibiotic | 0.04  | 0.11 |
| 35 | 576 | Trimethoprim                  | Antibiotic | 0.10  | 0.09 |
| 36 | 619 | Butoconazole nitrate          | Antifungal | -0.03 | 0.06 |
| 37 | 627 | Efavirenz                     | Antiviral  | 0.00  | 0.06 |

***L. pneumophila* inhibition, >80% (56)**

**Host-targeting (32)**

| Comp. No. | Name | Therapeutic Class       | Growth           | StDev |      |
|-----------|------|-------------------------|------------------|-------|------|
| 1         | 12   | Bepiridil·HCl           | Antianginal      | 0.17  | 0.08 |
| 2         | 16   | Loperamide·HCl          | Antidarrheal     | 0.16  | 0.09 |
| 3         | 17   | Fluspirilene            | Antipsychotic    | 0.16  | 0.09 |
| 4         | 93   | (+)-Butaclamol·HCl      | Antipsychotic    | 0.16  | 0.07 |
| 5         | 94   | (R)-(-)-Apomorphine·HCl | Antiparkinsonian | 0.20  | 0.14 |
| 6         | 95   | Chlorpromazine·HCl      | Antiemetic       | 0.19  | 0.02 |
| 7         | 107  | Spiperone·HCl           | Antipsychotic    | 0.17  | 0.06 |
| 8         | 130  | Clemastine              | Antihistamine    | 0.17  | 0.07 |
| 9         | 136  | Tolcapone               | Antiparkinsonian | 0.17  | 0.12 |
| 10        | 139  | Nisoldipine             | Antihypertensive | 0.14  | 0.11 |
| 11        | 149  | Aripiprazole            | Antipsychotic    | 0.15  | 0.01 |
| 12        | 158  | Bleomycin               | Antineoplastic   | 0.16  | 0.06 |
| 13        | 164  | Carvedilol              | Antihypertensive | 0.13  | 0.05 |
| 14        | 205  | Trifluoperazine·2HCl    | Antipsychotic    | 0.16  | 0.11 |
| 15        | 215  | Bromocriptine mesylate  | Antiparkinsonian | 0.13  | 0.14 |
| 16        | 223  | Oxatomide               | Antiallergic     | 0.13  | 0.11 |
| 17        | 262  | Raloxifene              | Antiosteoporotic | 0.18  | 0.03 |
| 18        | 330  | Lomerizine              | Antimigraine     | 0.20  | 0.03 |

|    |     |                                |                              |      |      |
|----|-----|--------------------------------|------------------------------|------|------|
| 19 | 429 | Estriol                        | Estrogen                     | 0.17 | 0.10 |
| 20 | 440 | Finasteride                    | Benign prostatic hypertrophy | 0.17 | 0.09 |
| 21 | 441 | 5-Fluorouracil                 | Antineoplastic               | 0.13 | 0.20 |
| 22 | 444 | Amitriptyline·HCl              | Antidepressant               | 0.11 | 0.16 |
| 23 | 482 | Medroxyprogesterone 17-Acetate | Progestogen                  | 0.20 | 0.11 |
| 24 | 527 | Pregnenolone                   | Prohormone/progestogen       | 0.18 | 0.15 |
| 25 | 558 | Telmisartan                    | Antihypertensive             | 0.15 | 0.15 |
| 26 | 594 | Dihydroergocristine            | Antivertigo                  | 0.11 | 0.16 |
| 27 | 609 | Trequinsin·HCl                 | Antihypertensive             | 0.15 | 0.11 |
| 28 | 620 | Mifepristone                   | Abortifacient                | 0.20 | 0.19 |
| 29 | 621 | Megestrol Acetate              | Progestogen                  | 0.17 | 0.10 |
| 30 | 622 | Melengestrol Acetate           | Progestogen                  | 0.13 | 0.06 |
| 31 | 637 | Trifluoperidol                 | Antipsychotic                | 0.13 | 0.06 |
| 32 | 639 | Cyproheptadine                 | Antihistamine                | 0.17 | 0.18 |

**Pathogen-targeting (24)**

| Comp. No. | Name | Therapeutic Class             | Growth        | StDev |      |
|-----------|------|-------------------------------|---------------|-------|------|
| 1         | 9    | Novobiocin·Na                 | Antibiotic    | 0.16  | 0.09 |
| 2         | 132  | Linezolid                     | Antibiotic    | 0.20  | 0.11 |
| 3         | 243  | Moxifloxacin·HCl              | Antibiotic    | 0.15  | 0.02 |
| 4         | 265  | Rifampicin                    | Antibiotic    | 0.13  | 0.05 |
| 5         | 286  | Pentamidine                   | Antiprotozoal | 0.20  | 0.07 |
| 6         | 422  | Doxycycline                   | Antibiotic    | 0.18  | 0.13 |
| 7         | 424  | Enoxacin                      | Antibiotic    | 0.16  | 0.09 |
| 8         | 454  | Gatifloxacin                  | Antibiotic    | 0.18  | 0.18 |
| 9         | 474  | Levofloxacin                  | Antibiotic    | 0.10  | 0.13 |
| 10        | 490  | Miconazole                    | Antifungal    | 0.17  | 0.11 |
| 11        | 491  | Minocycline                   | Antibiotic    | 0.13  | 0.09 |
| 12        | 495  | Nadifloxacin                  | Antibiotic    | 0.09  | 0.08 |
| 13        | 501  | Norfloxacin                   | Antibiotic    | 0.13  | 0.07 |
| 14        | 503  | Ofloxacin                     | Antibiotic    | 0.11  | 0.07 |
| 15        | 513  | Pazufloxacin                  | Antibiotic    | 0.12  | 0.07 |
| 16        | 514  | Pefloxacin mesylate dihydrate | Antibiotic    | 0.11  | 0.08 |
| 17        | 528  | Primaquine                    | Antimalarial  | 0.18  | 0.15 |
| 18        | 542  | Roxithromycin                 | Antibiotic    | 0.12  | 0.08 |
| 19        | 543  | Rufloxacin                    | Antibiotic    | 0.09  | 0.09 |
| 20        | 544  | Sarafloxacin                  | Antibiotic    | 0.19  | 0.14 |
| 21        | 549  | Sparfloxacin                  | Antibiotic    | 0.19  | 0.07 |
| 22        | 568  | Tosufloxacin                  | Antibiotic    | 0.17  | 0.13 |
| 23        | 578  | Tylosin                       | Antibiotic    | 0.18  | 0.12 |
| 24        | 619  | Butoconazole nitrate          | Antifungal    | 0.11  | 0.05 |

***B. abortus* inhibition, >50% (15)**

**Host-targeting (11)**

| Comp. No | Name | Therapeutic Class    | Growth           | StDev |    |
|----------|------|----------------------|------------------|-------|----|
| 1        | 205  | Trifluoperazine·2HCl | Antipsychotic    | 0.48  | NA |
| 2        | 226  | Dexamethasone        | Antiinflammatory | 0.50  | NA |
| 3        | 330  | Lomerizine           | Antimigraine     | 0.47  | NA |

|                                                   |          |                         |                      |        |       |
|---------------------------------------------------|----------|-------------------------|----------------------|--------|-------|
| 4                                                 | 398      | Clomiphene              | Gonad stimulant      | 0.44   | NA    |
| 5                                                 | 401      | Clobetasol Propionate   | Antiinflammatory     | 0.36   | NA    |
| 6                                                 | 402      | Orphenadrine citrate    | Antispasmodic        | 0.39   | NA    |
| 7                                                 | 411      | Dehydroepiandrosterone  | Adrenal hormone      | 0.40   | NA    |
| 8                                                 | 412      | Desloratadine           | Antihistamine        | 0.37   | NA    |
| 9                                                 | 421      | Doxofylline             | Bronchodilator       | 0.47   | NA    |
| 10                                                | 446      | Fluocinolone acetonide  | Antiinflammatory     | 0.21   | NA    |
| 11                                                | 463      | 17- Hydroxyprogesterone | Progestogen          | 0.33   | NA    |
| Pathogen-targeting (4)                            |          |                         |                      |        |       |
|                                                   | Comp. No | Name                    | Therapeutic Class    | Growth | StDev |
| 1                                                 | 11       | Spectinomycin·2HCl      | Antibiotic           | 0.29   | NA    |
| 2                                                 | 373      | Azithromycin            | Antibiotic           | 0.20   | NA    |
| 3                                                 | 422      | Doxycycline             | Antibiotic           | 0.43   | NA    |
| 4                                                 | 561      | Tetracycline            | Antibiotic           | 0.48   | NA    |
| <b><i>R. conorii</i> inhibition, &gt;80% (28)</b> |          |                         |                      |        |       |
| Host-targeting (20)                               |          |                         |                      |        |       |
|                                                   | Comp. No | Name                    | Therapeutic Class    | Growth | StDev |
| 1                                                 | 12       | Bepridil·HCl            | Antianginal          | 0.03   | NA    |
| 2                                                 | 16       | Loperamide·HCl          | Antidarrheal         | -0.02  | NA    |
| 3                                                 | 17       | Fluspirilene            | Antipsychotic        | -0.16  | NA    |
| 4                                                 | 34       | Prazosin·HCl            | Antihypertensive     | -0.22  | NA    |
| 5                                                 | 93       | (+)-Butaclamol·HCl      | Antipsychotic        | 0.09   | NA    |
| 6                                                 | 97       | Fluphenazine·2HCl       | Antipsychotic        | -0.18  | NA    |
| 7                                                 | 105      | Naltrindole·HCl         | Opioid antagonist    | 0.03   | NA    |
| 8                                                 | 130      | Clemastine              | Antihistamine        | -0.09  | NA    |
| 9                                                 | 139      | Nisoldipine             | Antihypertensive     | 0.10   | NA    |
| 10                                                | 149      | Aripiprazole            | Antipsychotic        | -0.30  | NA    |
| 11                                                | 198      | Verapamil               | Antihypertensive     | 0.20   | NA    |
| 12                                                | 202      | Felodipine              | Antihypertensive     | 0.15   | NA    |
| 13                                                | 205      | Trifluoperazine·2HCl    | Antipsychotic        | 0.00   | NA    |
| 14                                                | 220      | Calcifediol             | Vitamin/antirachitic | 0.10   | NA    |
| 15                                                | 254      | Mevastatin              | Antihyperlipidemic   | 0.06   | NA    |
| 16                                                | 260      | Troglitazone            | Antidiabetic         | 0.19   | NA    |
| 17                                                | 296      | Bexarotene              | Antineoplastic       | -0.08  | NA    |
| 18                                                | 398      | Clomiphene              | Gonad stimulant      | 0.14   | NA    |
| 19                                                | 596      | Fluoxetine              | Antidepressant       | -0.13  | NA    |
| 20                                                | 637      | Trifluoperidol          | Antipsychotic        | 0.12   | NA    |
| Pathogen-targeting (8)                            |          |                         |                      |        |       |
|                                                   | Comp. No | Name                    | Therapeutic Class    | Growth | StDev |
| 1                                                 | 2        | Clindamycin·HCl         | Antibiotic           | -0.22  | NA    |
| 2                                                 | 147      | Sertaconazole           | Antifungal           | 0.10   | NA    |
| 3                                                 | 286      | Pentamidine             | Antiprotozoal        | -0.33  | NA    |
| 4                                                 | 376      | Bifonazole              | Antifungal           | 0.19   | NA    |
| 5                                                 | 490      | Miconazole              | Antifungal           | 0.05   | NA    |
| 6                                                 | 519      | Piperacillin            | Antibiotic           | 0.20   | NA    |
| 7                                                 | 561      | Tetracycline            | Antibiotic           | 0.16   | NA    |

|   |     |                      |            |      |    |
|---|-----|----------------------|------------|------|----|
| 8 | 619 | Butoconazole nitrate | Antifungal | 0.03 | NA |
|---|-----|----------------------|------------|------|----|
