# Supplementary figures and images for: Host-Directed Antimicrobial Drugs with Broad-Spectrum Efficacy against Intracellular Bacterial Pathogens
Source: PubMed Central journal article supplement — mBio. 2014 Jul 29;5(4):e01534-14. doi: 10.1128/mBio.01534-14 (PMC4128363; doi:10.1128/mbio.01534-14), 2014-07-29

**A**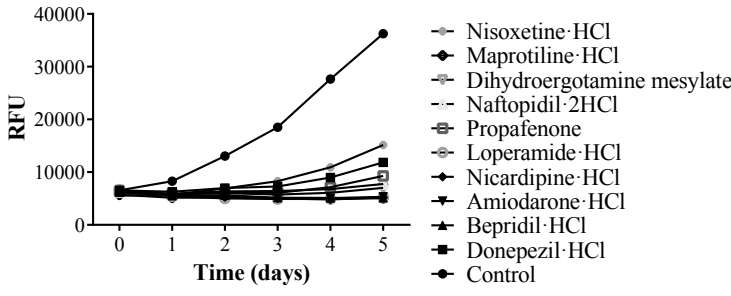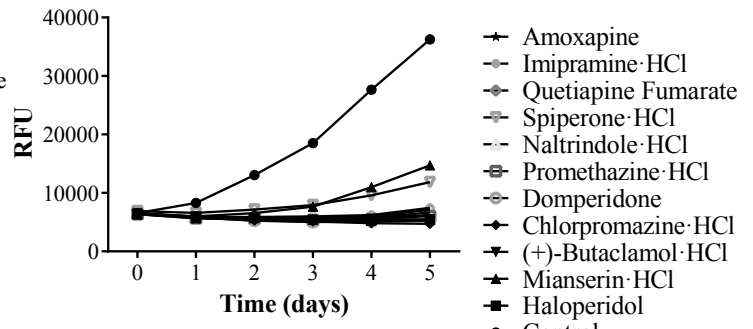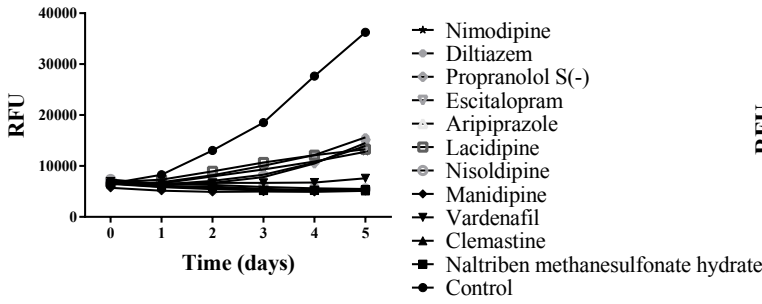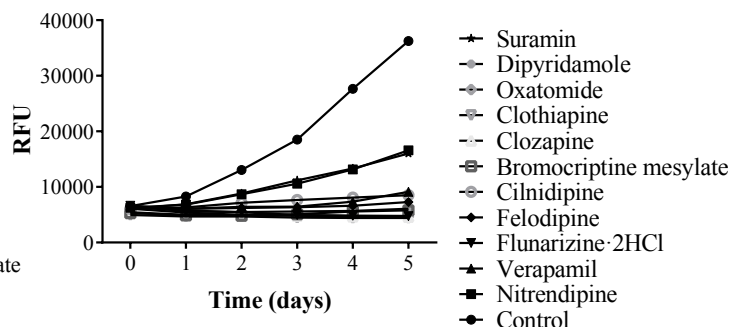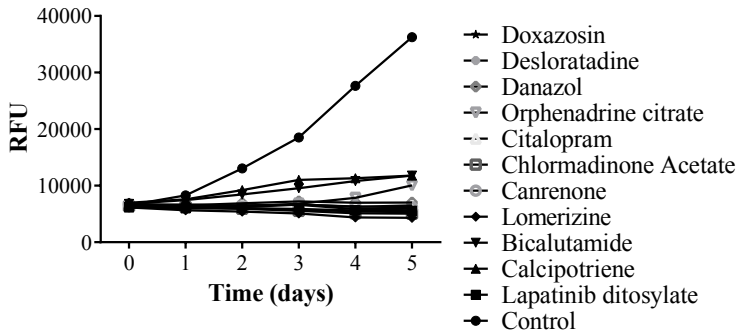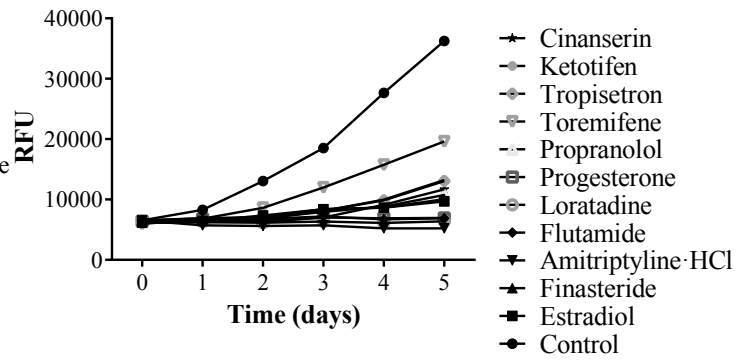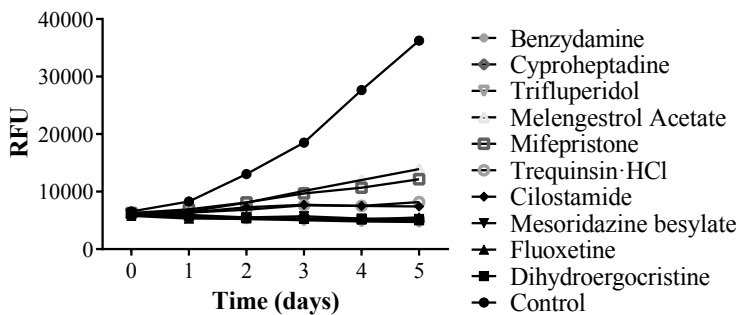

**B**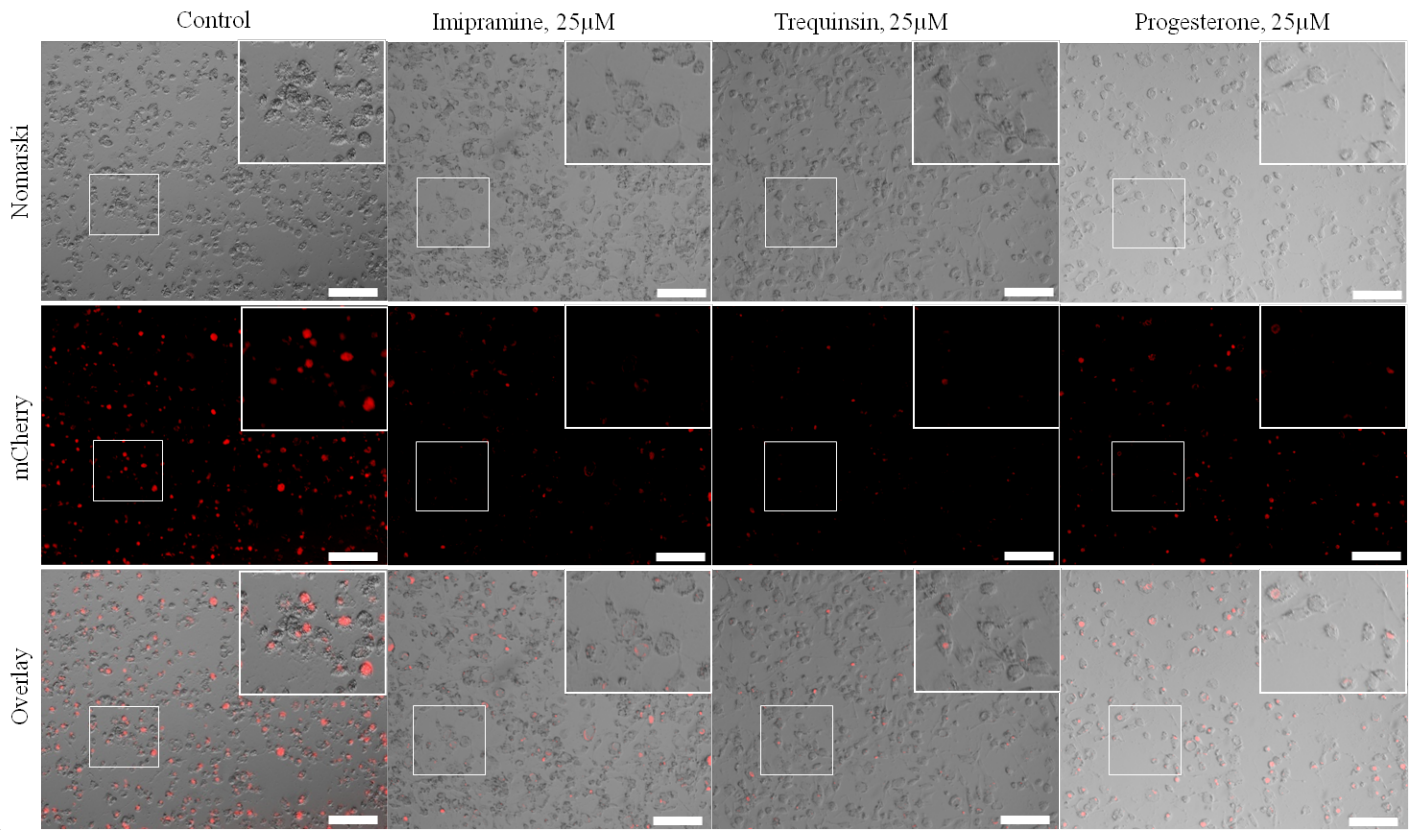**C**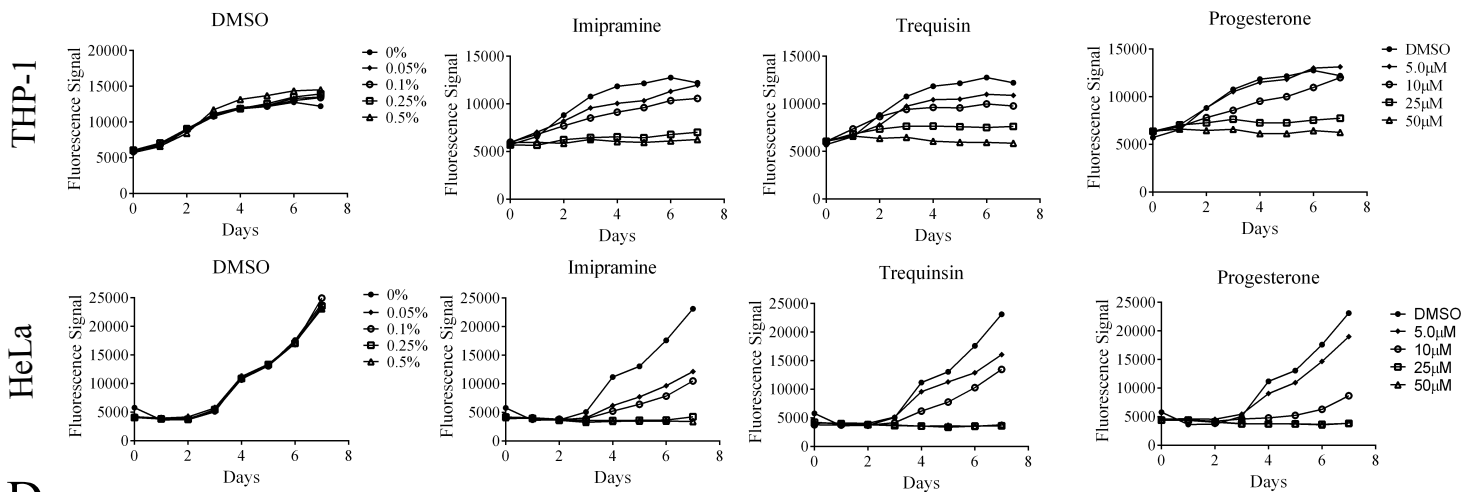**D**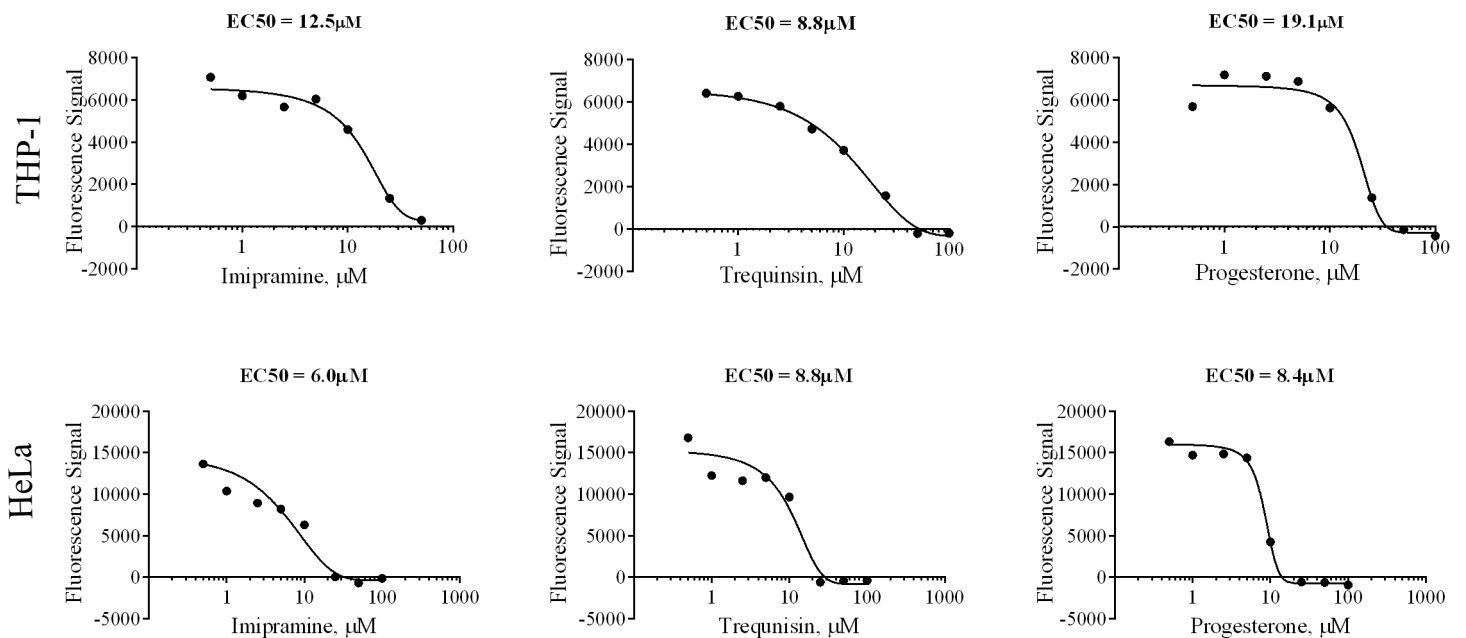

Supplement: mbo004141922sf04.pdf [file mbo004141922sf04.pdf]

**A****HeLa****THP-1**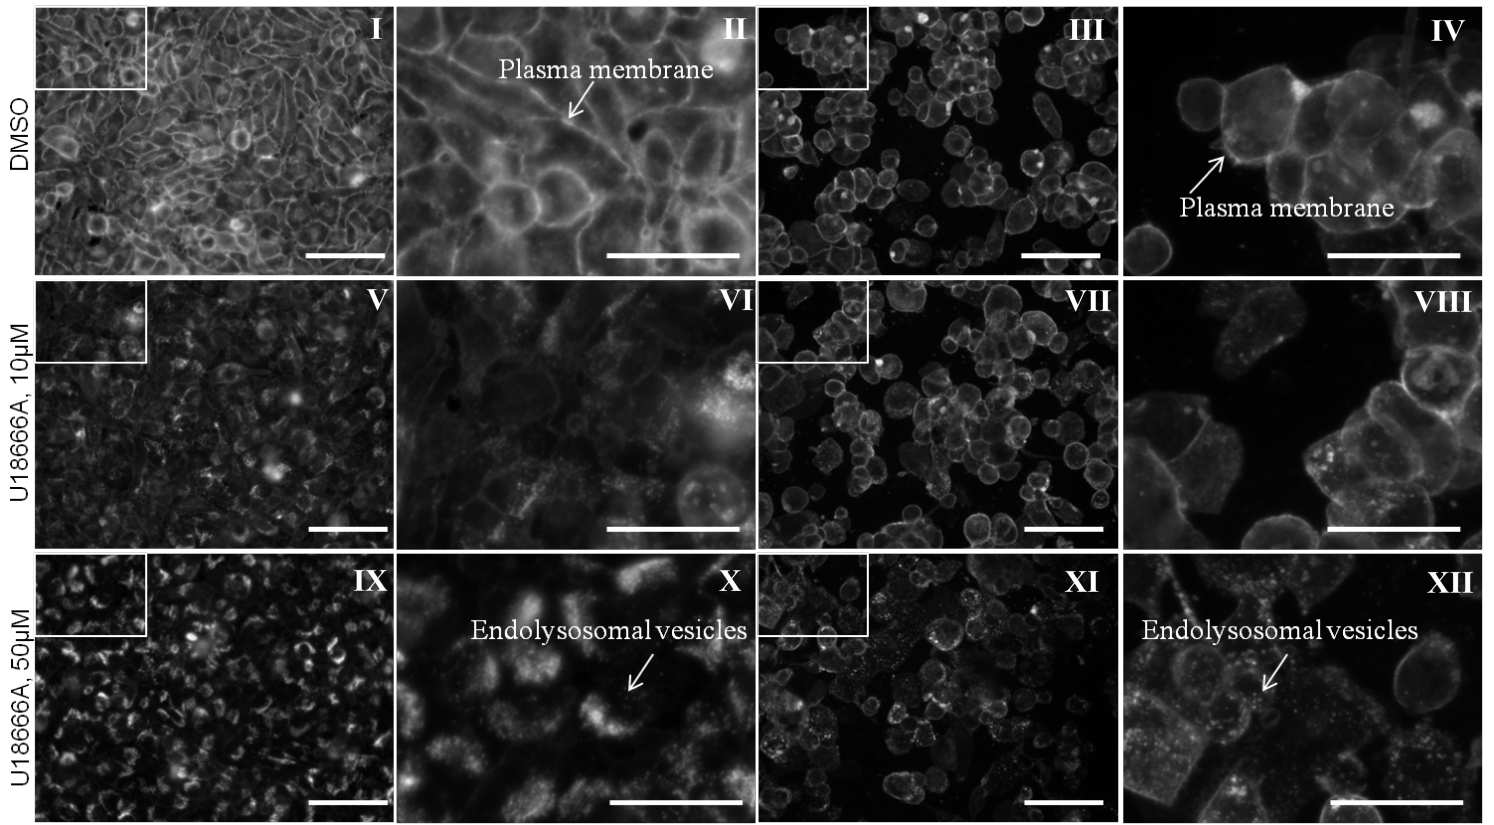

B

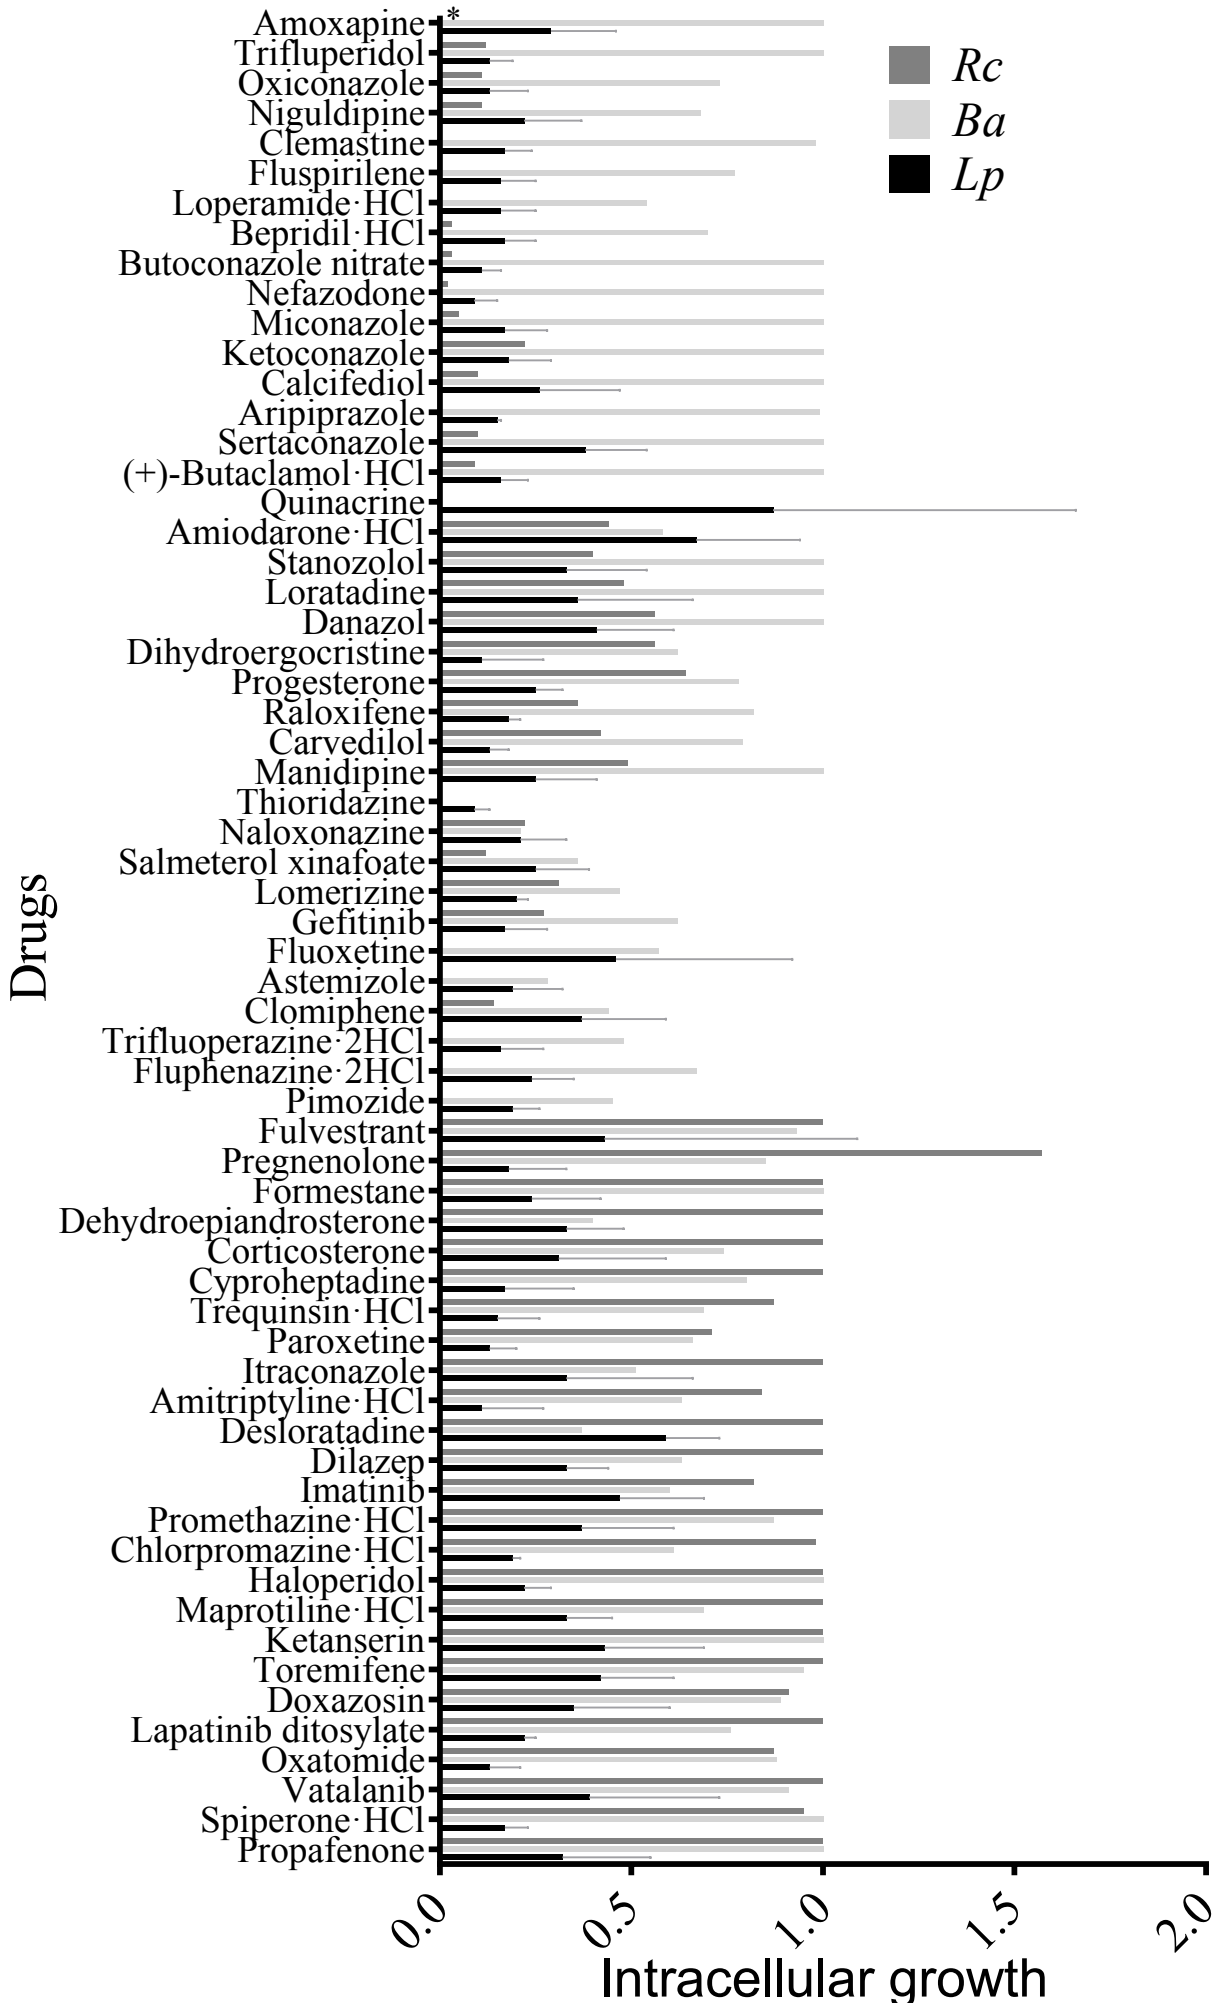

Supplement: mbo004141922sf06.pdf [file mbo004141922sf06.pdf]
